# Supplementary material for: Single-molecule magnet behaviour and catalytic properties of tetrahedral Co(ii) complexes bearing chloride and 1,2-disubstituted benzimidazole as ligands
Source: Royal Society of Chemistry journal article supplement (doi:10.1039/d2dt01440h), 2022-01-01
Supplement: d2dt01440h1.pdf [file d2dt01440h1.pdf]

Electronic Supplementary Information (ESI) for

## **Single-molecule magnet behaviour and catalytic properties of tetrahedral Co(II) complexes bearing chloride and 1,2-disubstituted benzimidazole as ligands**

Jorge Luiz Sônego Milani,<sup>\*a,b</sup> Álvaro Farias Arruda da Mata,<sup>a</sup> Igor Santos Oliveira,<sup>a</sup> Ana Karoline Silva Mendanha Valdo,<sup>a</sup> Felipe Terra Martins,<sup>a</sup> Renato Rabelo,<sup>c</sup> Danielle Cangussu,<sup>a</sup> Joan Cano,<sup>\*c</sup> Francesc Lloret,<sup>c</sup> Miguel Julve,<sup>c</sup> Rafael Pavão das Chagas<sup>\*a</sup>

<sup>a</sup> Instituto de Química, Universidade Federal de Goiás – UFG, Goiânia – GO, Brazil

<sup>b</sup> Departamento de Química, Universidade Federal de Juiz de Fora – UFJF, Juiz de Fora – MG, Brazil

<sup>c</sup> Universitat de València, Departament de Química Inorgànica/Instituto de Ciencia Molecular (ICMol), Paterna (València), Spain

\*Corresponding Authors: J. L. S. Milani – e-mail: [jorge.milani@ufjf.edu.br](mailto:jorge.milani@ufjf.edu.br)

J. Cano – e-mail: [joan.cano@uv.es](mailto:joan.cano@uv.es)

R. P. das Chagas – e-mail: [rpchagas@ufg.br](mailto:rpchagas@ufg.br)

## Table of Contents

|                                                                                |           |
|--------------------------------------------------------------------------------|-----------|
| <b>1. Compounds characterisation .....</b>                                     | <b>3</b>  |
| <b>1.1. <sup>1</sup>H and <sup>13</sup>C NMR spectra .....</b>                 | <b>3</b>  |
| <b>1.2. Infrared spectroscopy .....</b>                                        | <b>13</b> |
| <b>1.3. ESI-HRMS .....</b>                                                     | <b>16</b> |
| <b>1.4. Electronic spectra.....</b>                                            | <b>18</b> |
| <b>1.5. Thermogravimetric analysis .....</b>                                   | <b>19</b> |
| <b>1.6. X-ray crystallographic data collection and crystal structure .....</b> | <b>26</b> |
| <b>1.7. EPR spectra and theoretical calculations .....</b>                     | <b>29</b> |
| <b>1.8. Magnetic measurements .....</b>                                        | <b>30</b> |
| <b>1.9. <sup>1</sup>H NMR analysis of cycloaddition reactions .....</b>        | <b>36</b> |

# 1. Compounds characterisation

## 1.1. $^1\text{H}$ and $^{13}\text{C}$ NMR spectra

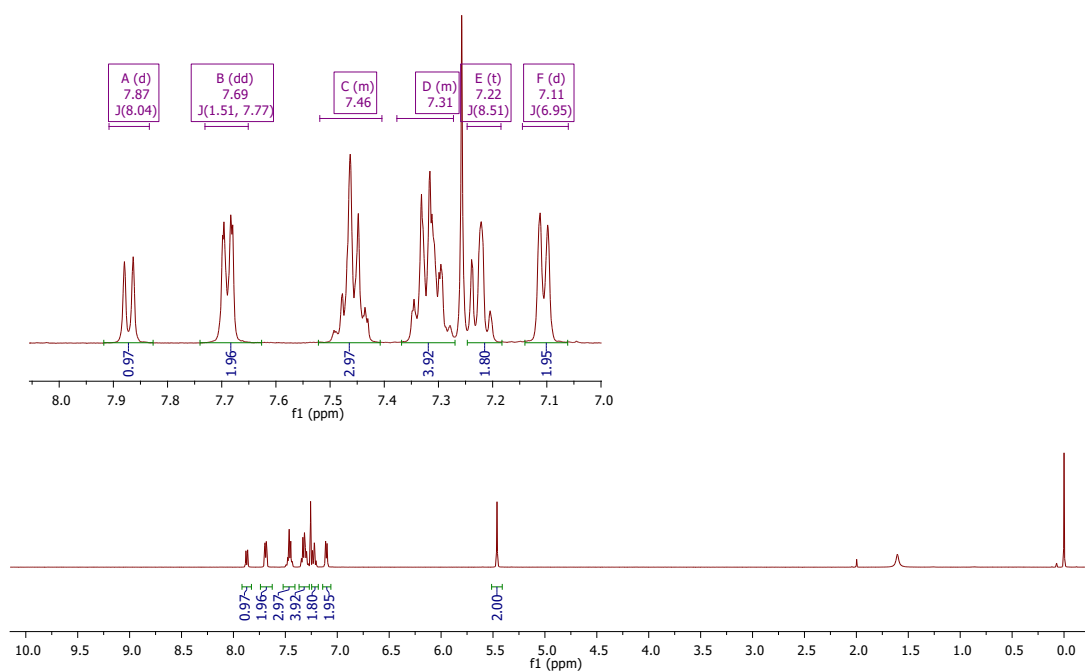

Figure S1.  $^1\text{H}$  NMR spectra of  $\text{L}^1$  in  $\text{CDCl}_3$ .

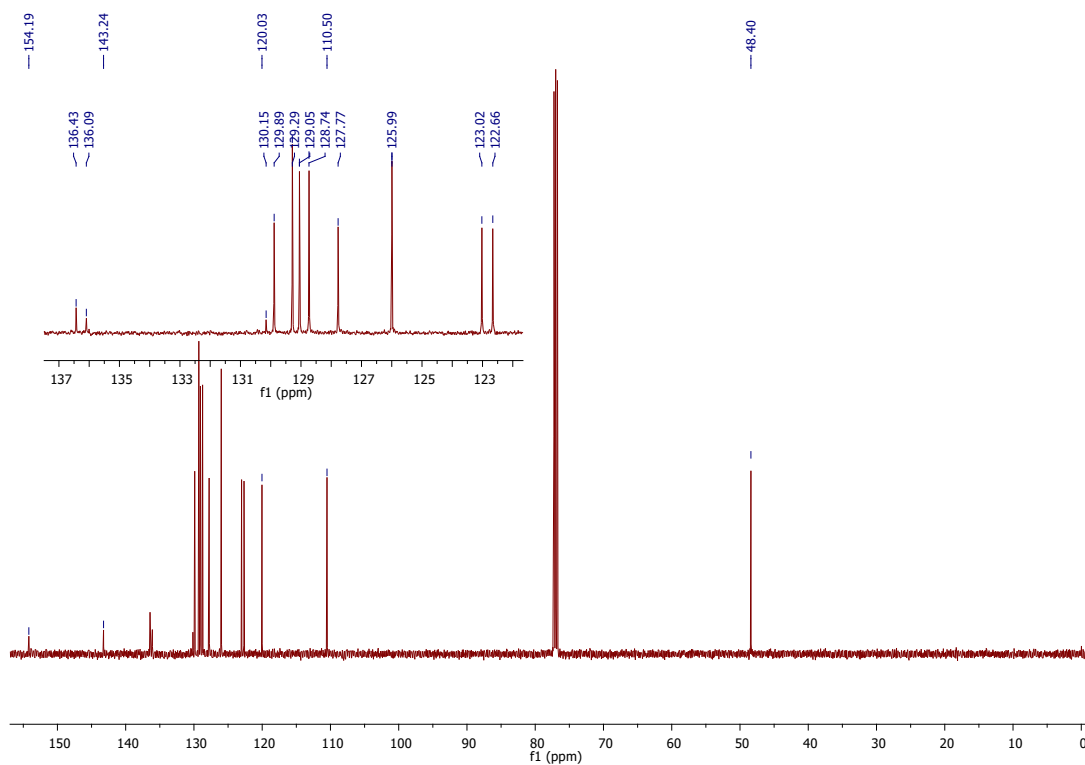

**Figure S2.**  $^{13}\text{C}$  NMR spectra of  $\text{L}^1$  in  $\text{CDCl}_3$ .

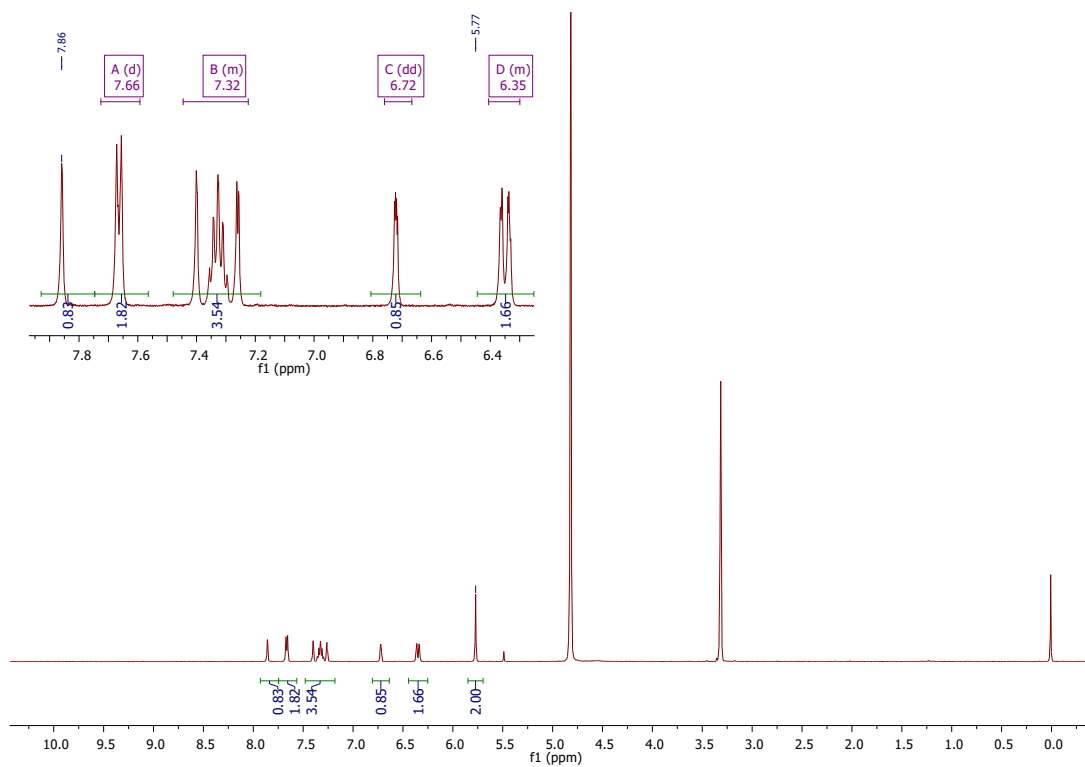

**Figure S3.**  $^1\text{H}$  NMR spectra of  $\text{L}^2$  in  $\text{CD}_3\text{OD}$ .

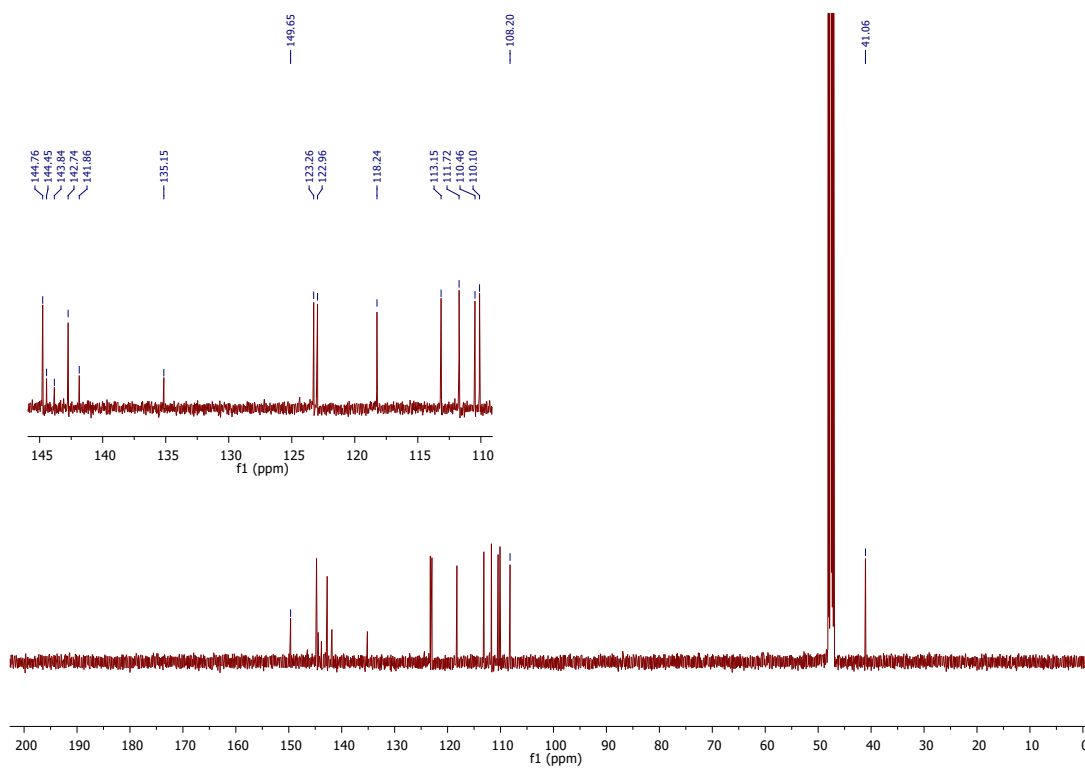

**Figure S4.**  $^{13}\text{C}$  NMR spectra of  $\text{L}^2$  in  $\text{CD}_3\text{OD}$ .

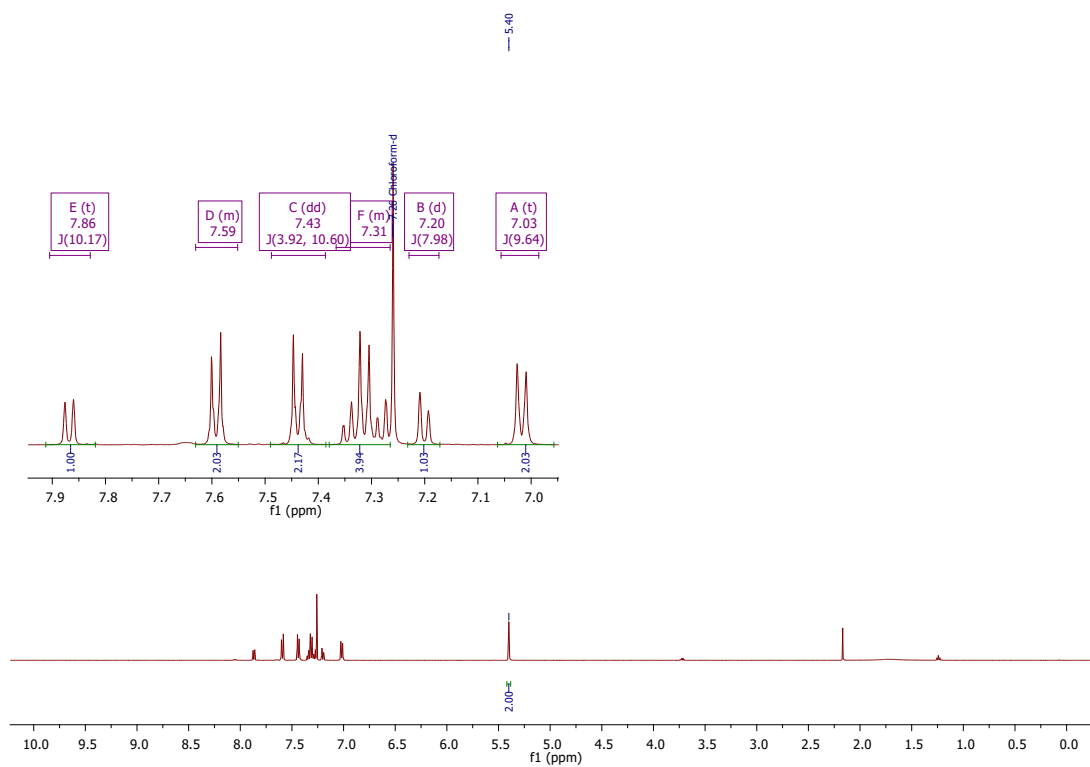

Figure S5.  $^1\text{H}$  NMR spectra of  $\text{L}^3$  in  $\text{CDCl}_3$ .

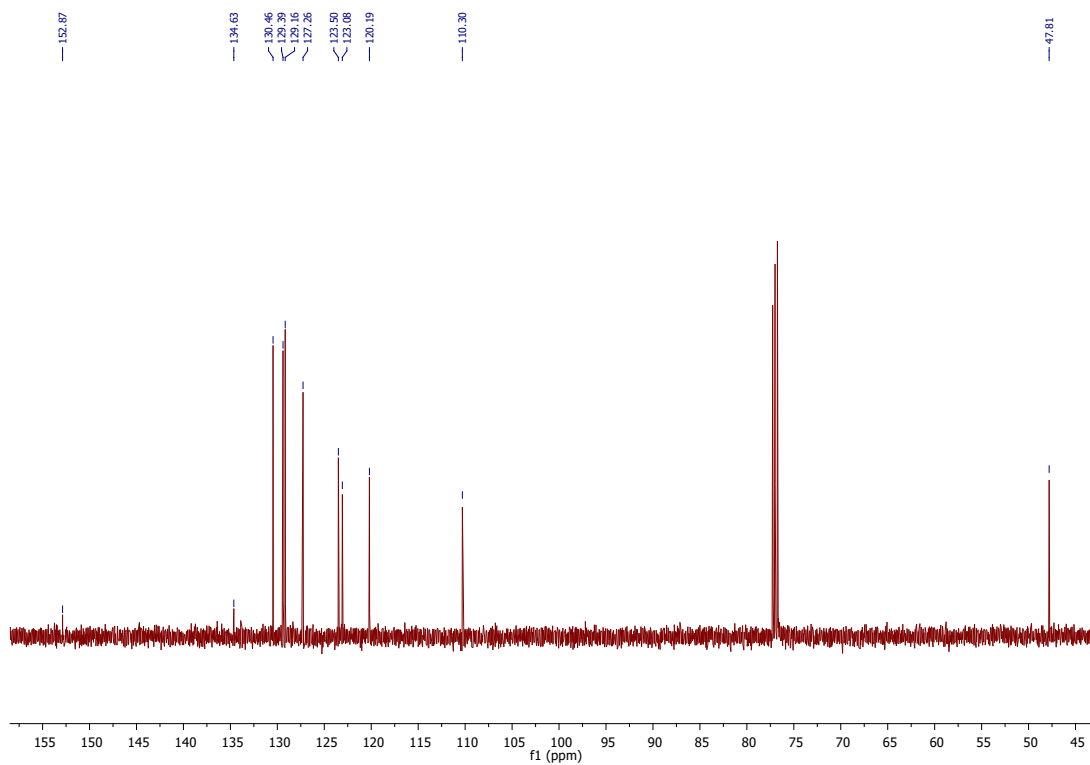

Figure S6.  $^{13}\text{C}$  NMR spectra of  $\text{L}^3$  in  $\text{CDCl}_3$ .

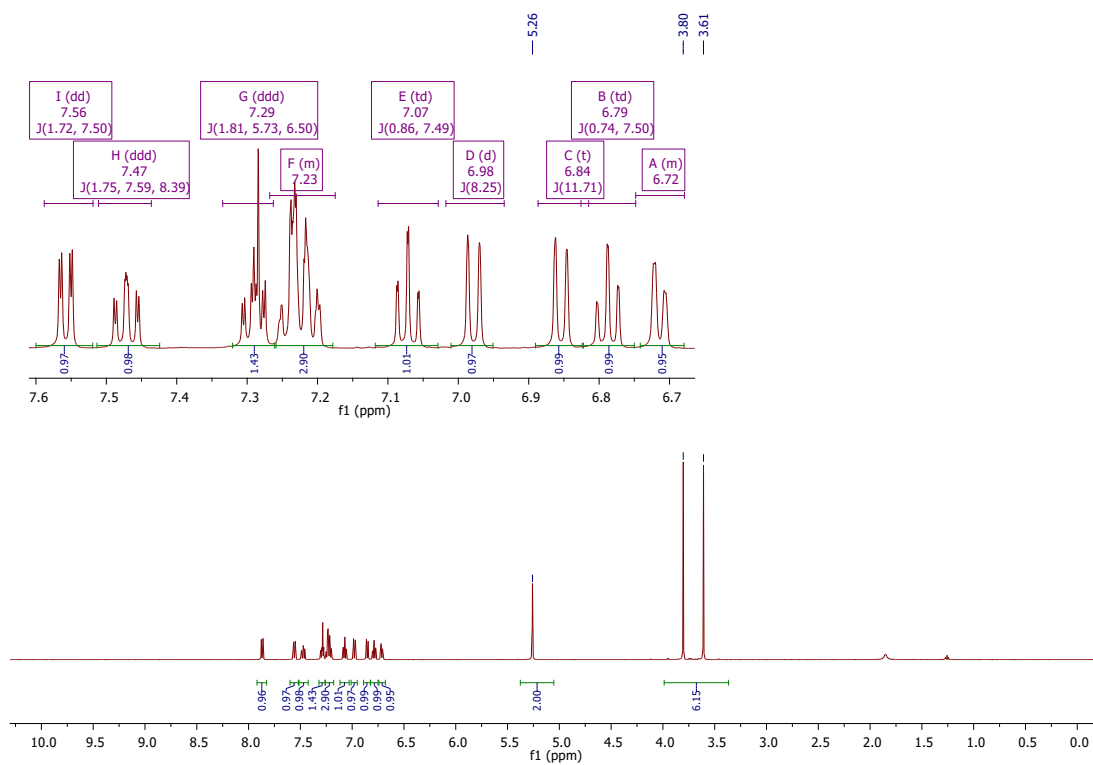

Figure S7.  $^1\text{H}$  NMR spectra of  $\text{L}^4$  in  $\text{CDCl}_3$ .

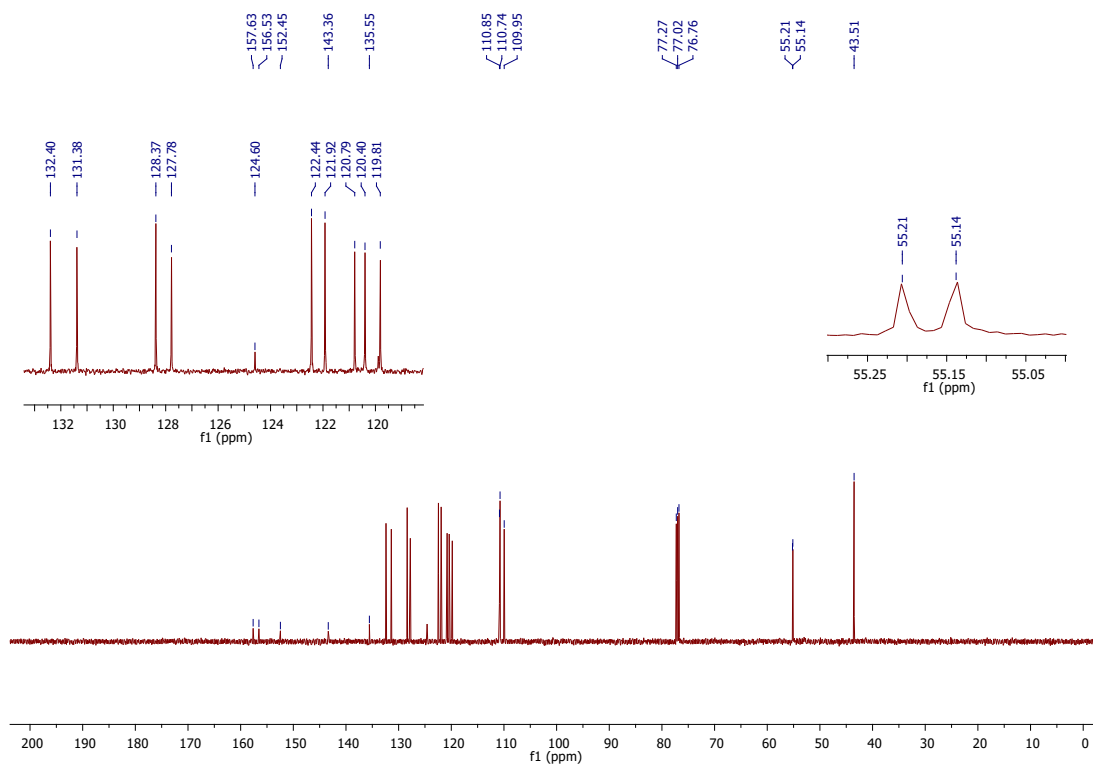

Figure S8.  $^{13}\text{C}$  NMR spectra of  $\text{L}^4$  in  $\text{CDCl}_3$ .

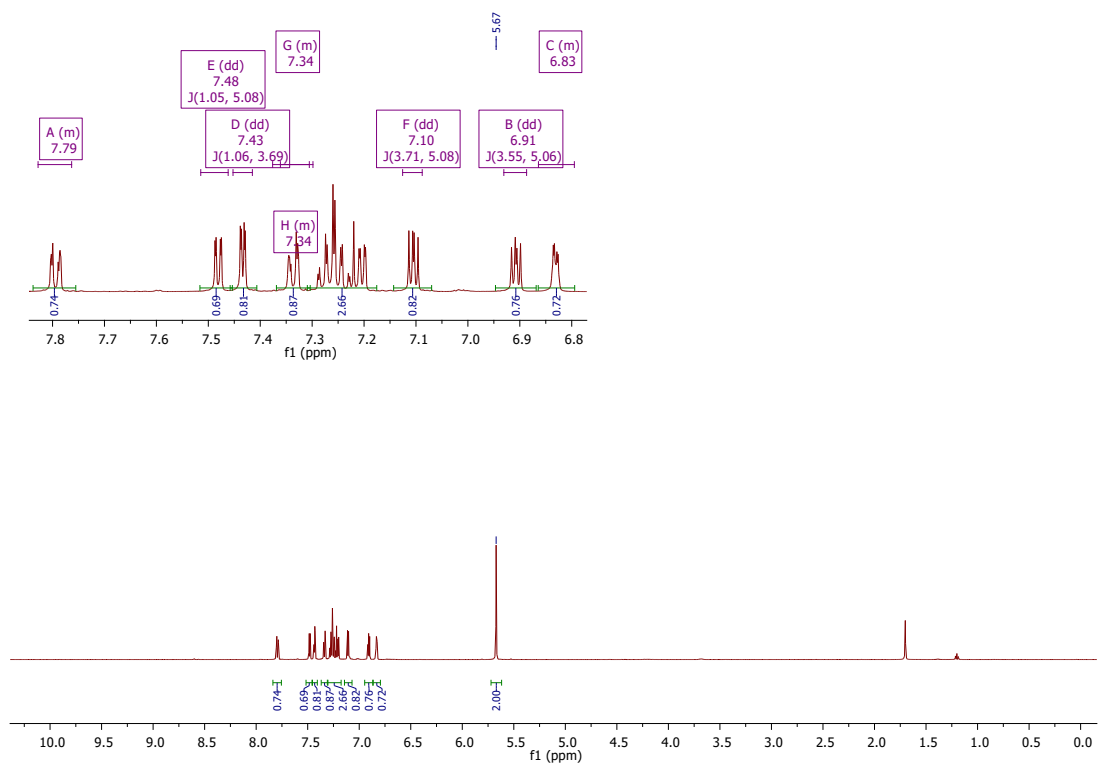

**Figure S9.  $^1\text{H}$  NMR spectra of  $\text{L}^5$  in  $\text{CDCl}_3$ .**

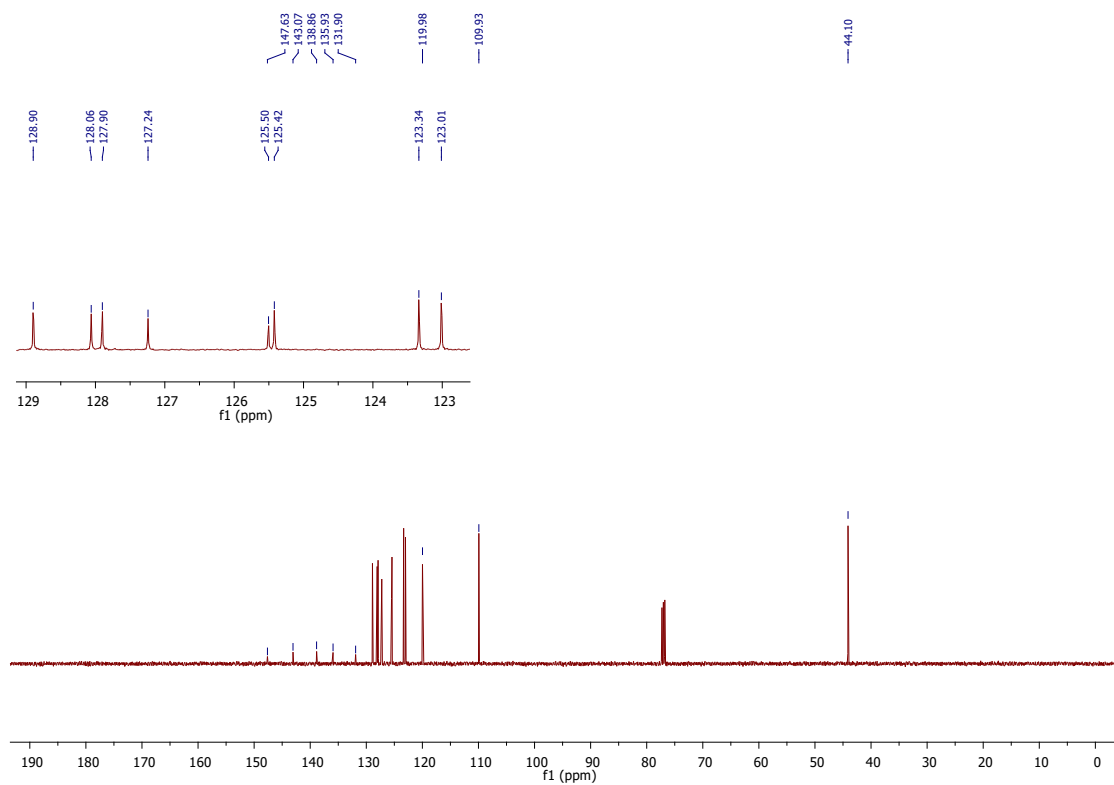

**Figure S10.  $^{13}\text{C}$  NMR spectra of  $\text{L}^5$  in  $\text{CDCl}_3$ .**

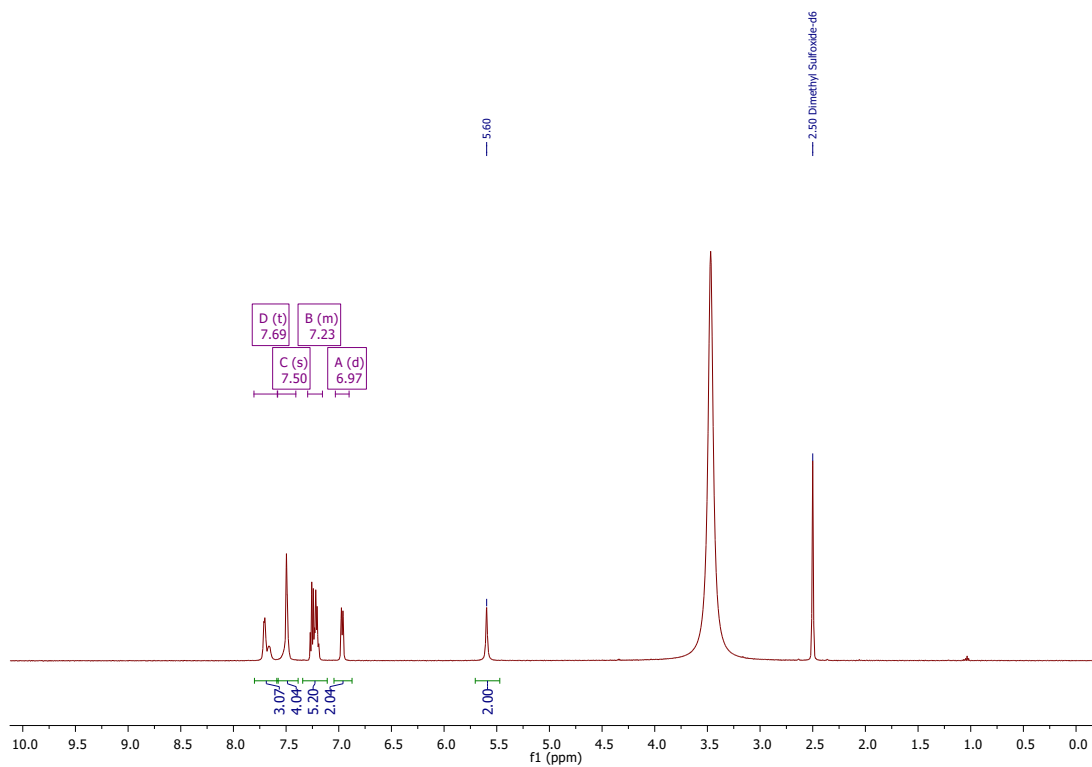

Figure S11.  $^1\text{H}$  NMR spectra of **1** in  $\text{DMSO-}d_6$ .

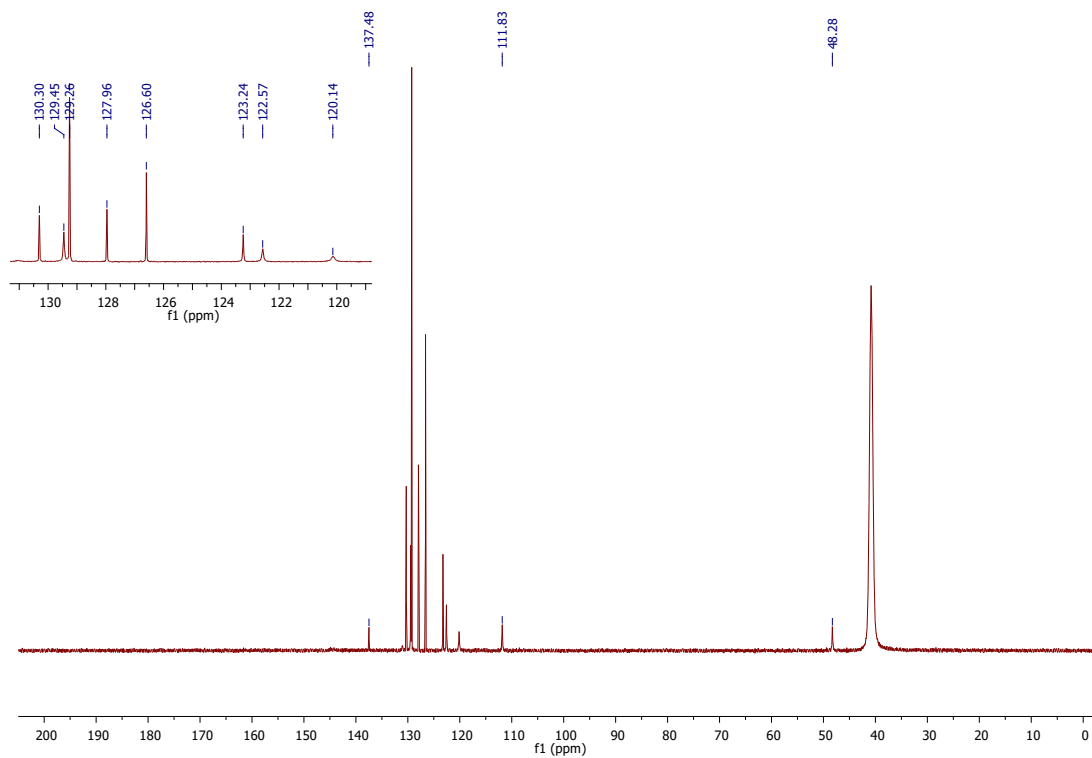

Figure S12.  $^{13}\text{C}$  NMR spectra of **1** in  $\text{DMSO-}d_6$ .



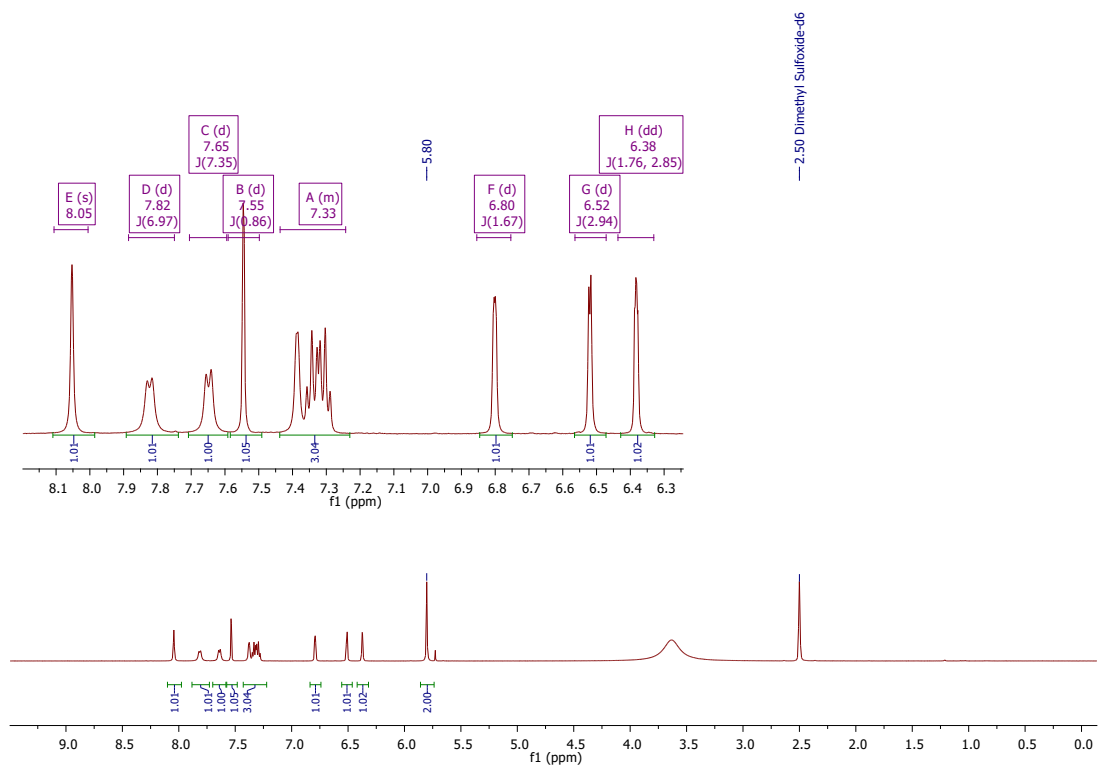

Figure S13.  $^1\text{H}$  NMR spectra of **2** in  $\text{DMSO-}d_6$ .

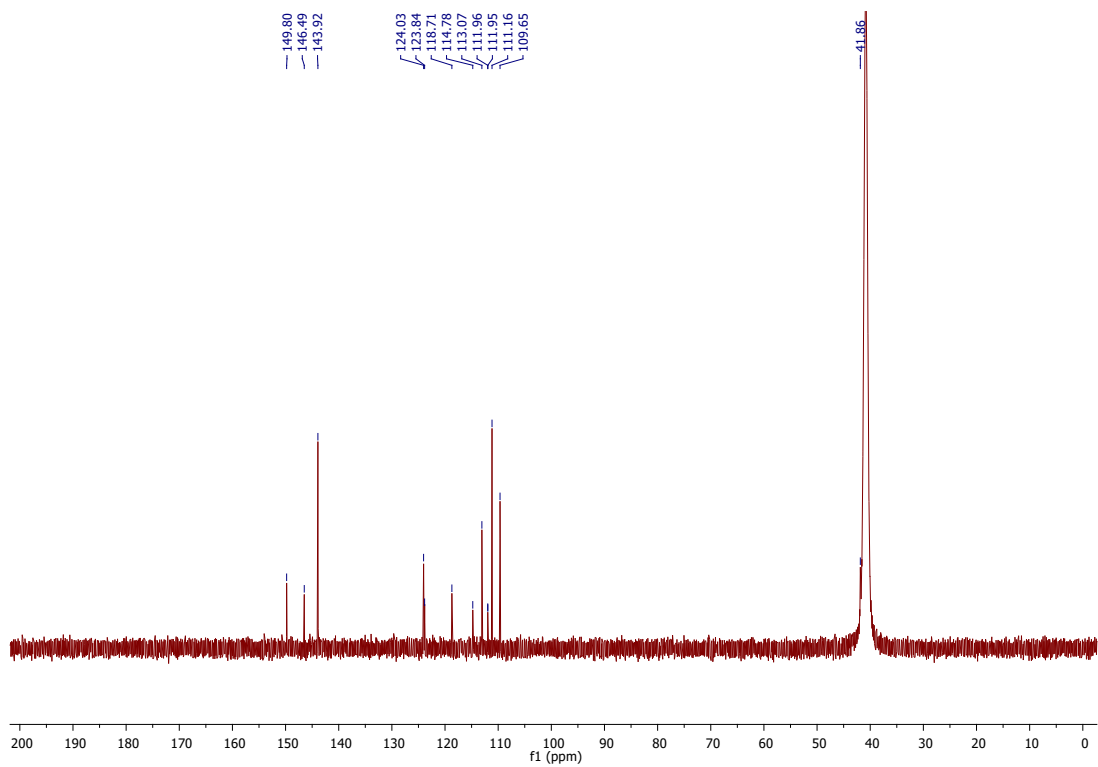

Figure S14.  $^{13}\text{C}$  NMR spectra of **2** in  $\text{DMSO-}d_6$ .

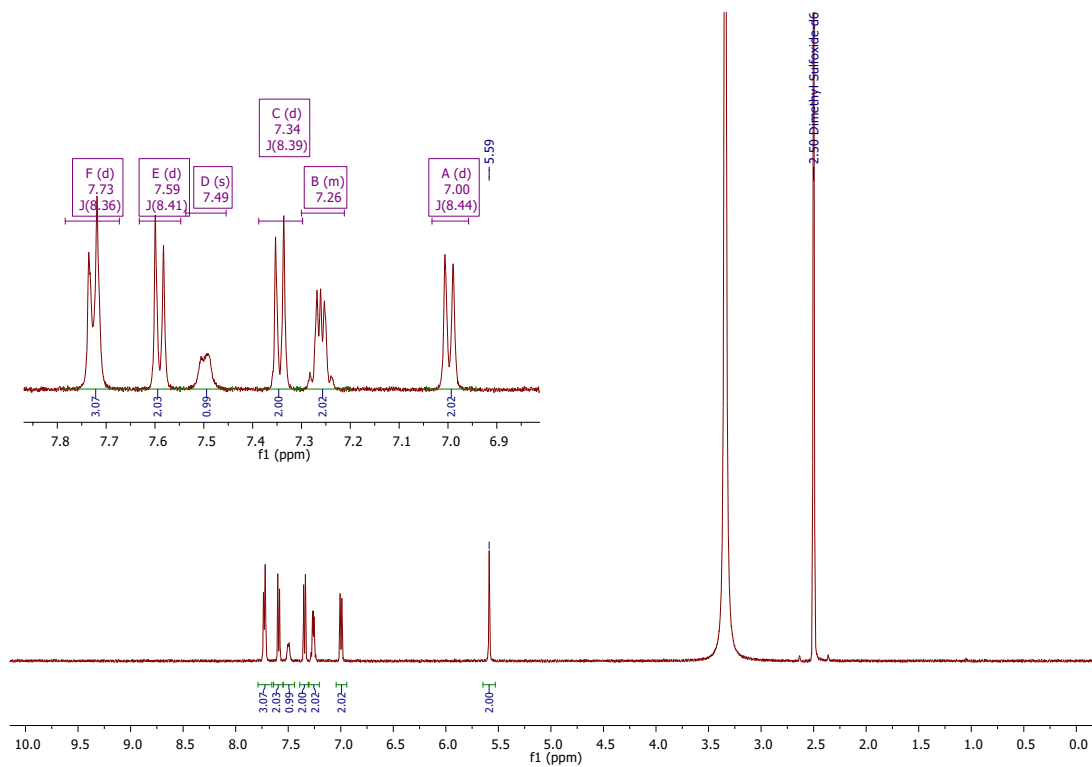

Figure S15.  $^1\text{H}$  NMR spectra of **3** in  $\text{DMSO-}d_6$ .

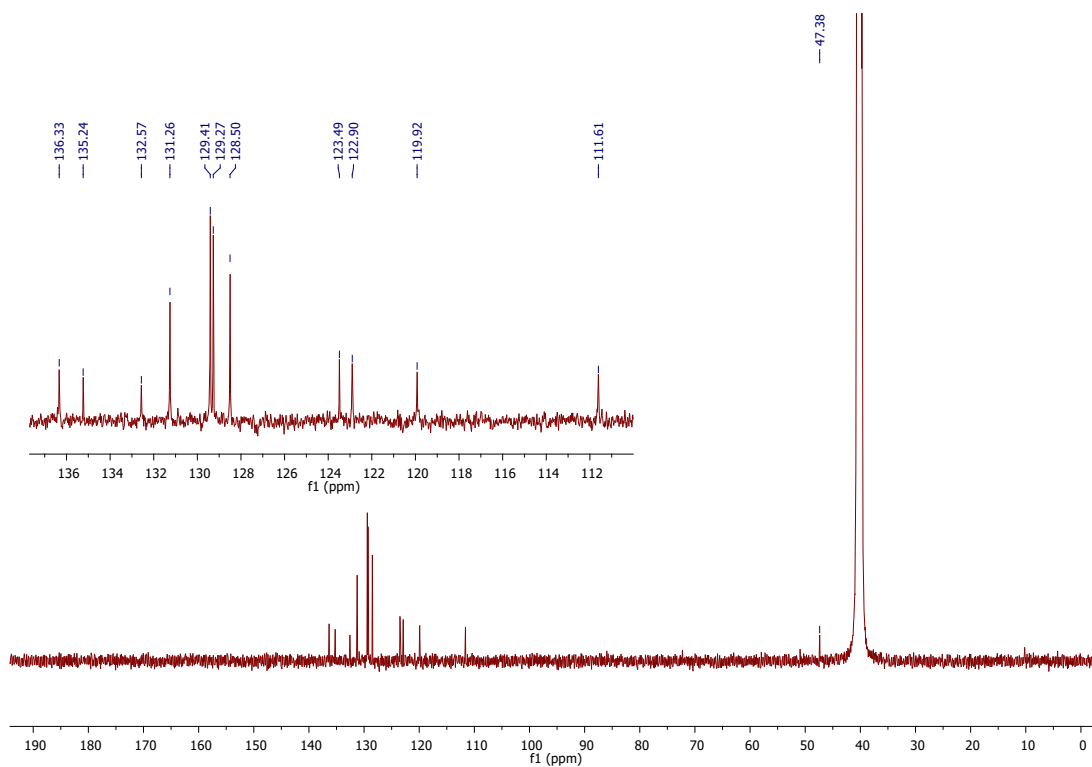

Figure S16.  $^{13}\text{C}$  NMR spectra of **3** in  $\text{DMSO-}d_6$ .

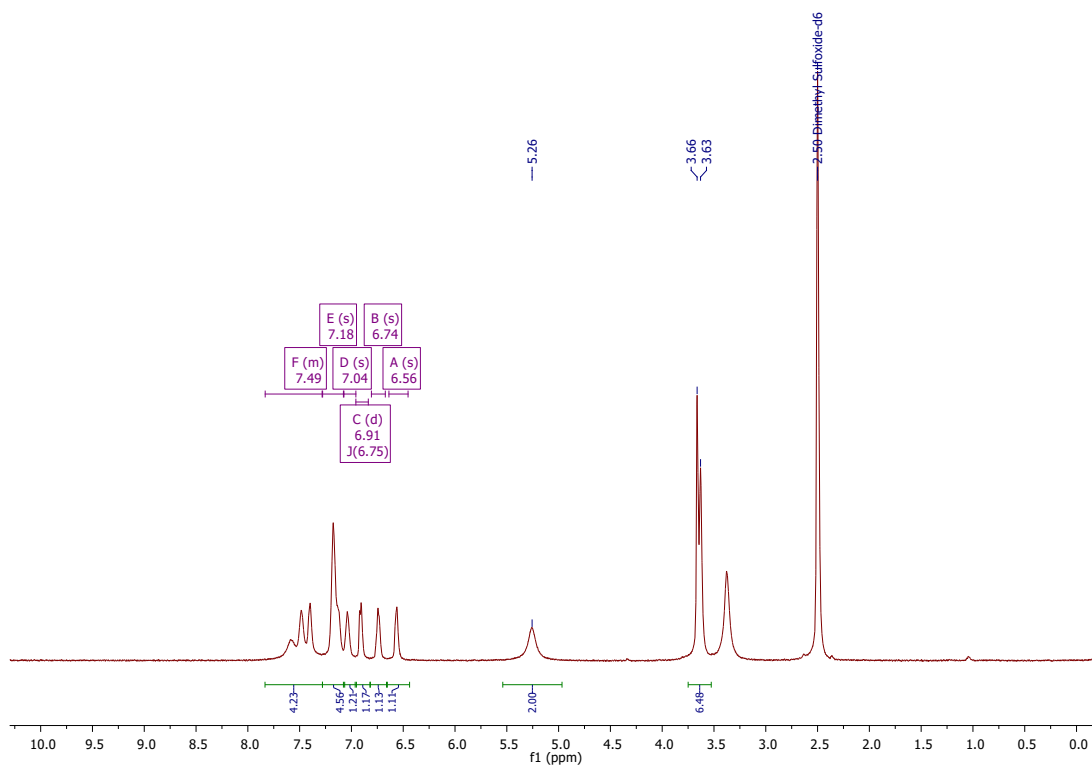

Figure S17.  $^1\text{H}$  NMR spectra of **4** in  $\text{DMSO-}d_6$ .

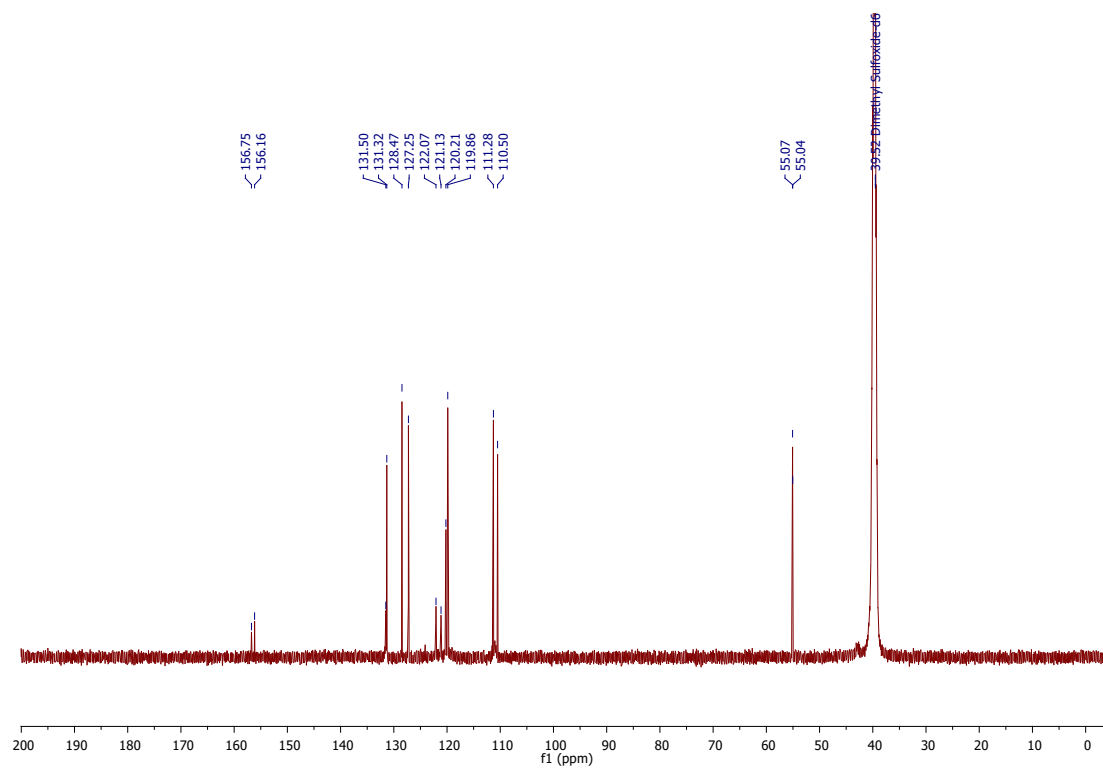

Figure S18.  $^{13}\text{C}$  NMR spectra of **4** in  $\text{DMSO-}d_6$ .

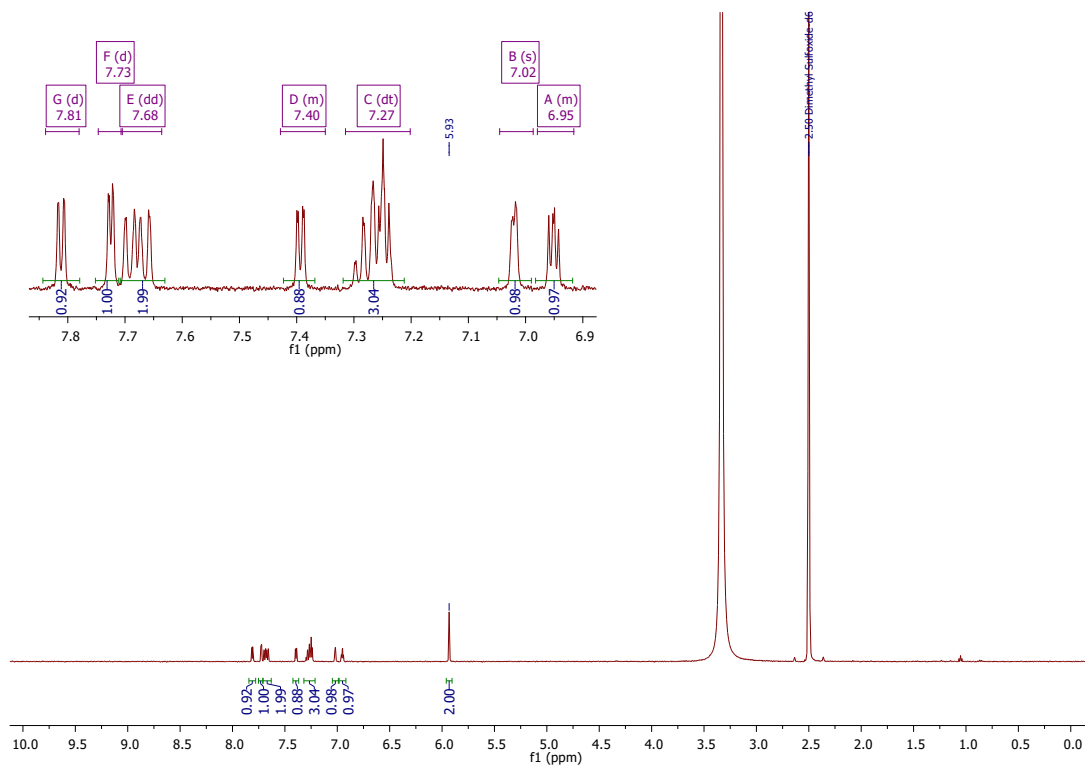

Figure S19.  $^1\text{H}$  NMR spectra of **5** in  $\text{DMSO-}d_6$ .

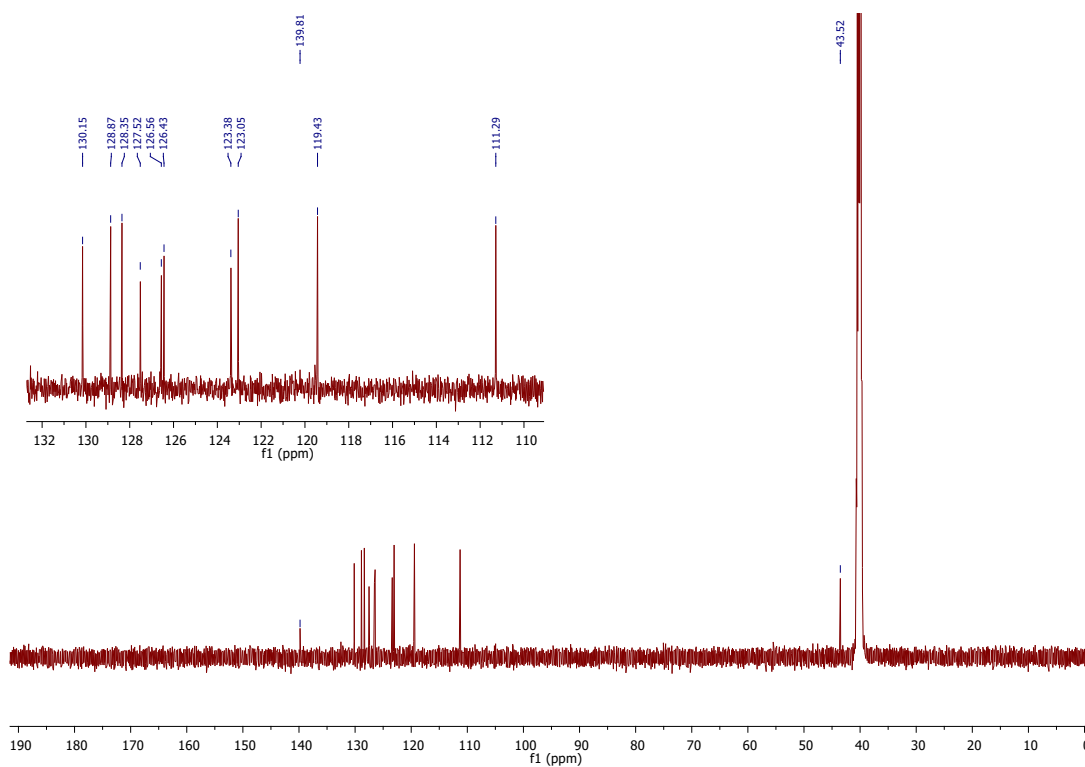

Figure S20.  $^{13}\text{C}$  NMR spectra of **5** in  $\text{DMSO-}d_6$ .

## 1.2. Infrared spectroscopy

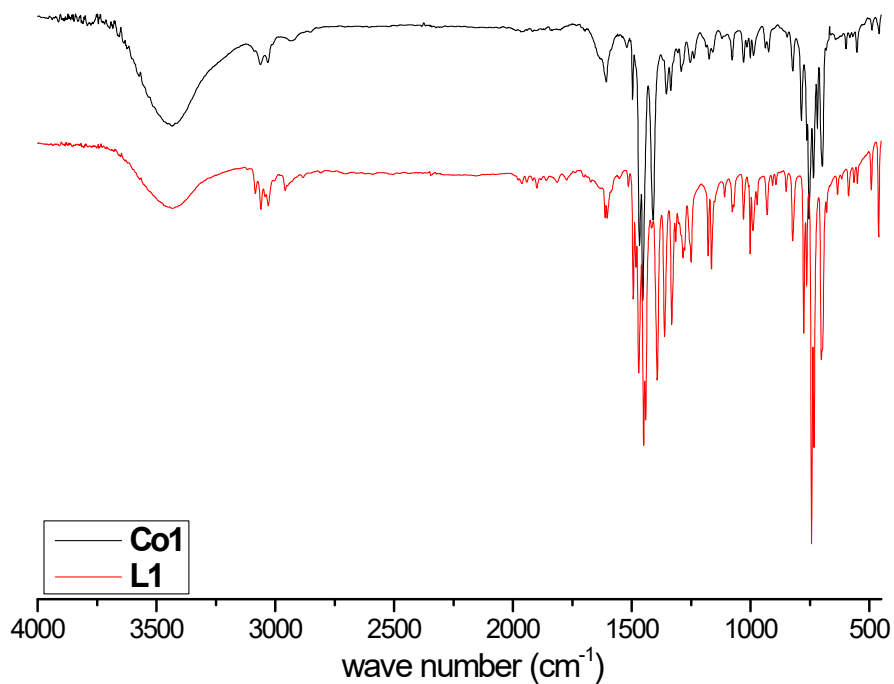

Figure S21. IR spectra of  $L^1$  and **1**.

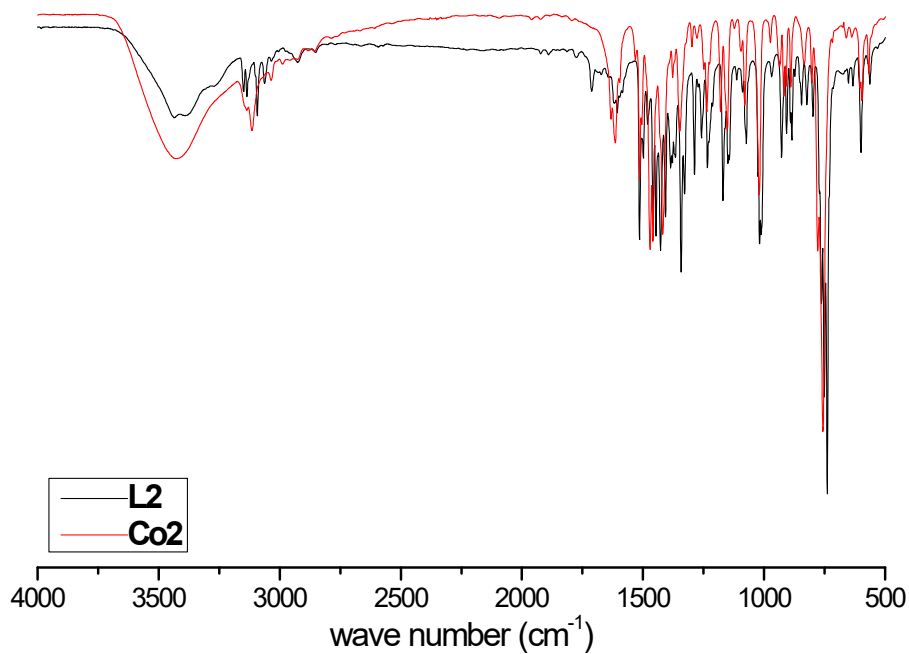

Figure S22. IR spectra of  $L^2$  and **2**.

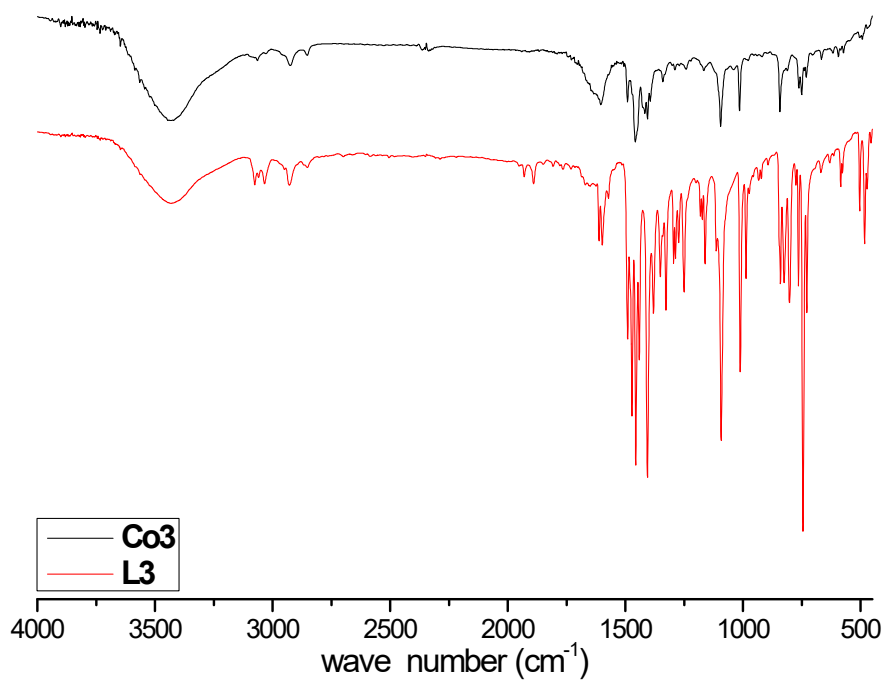

**Figure S23.** IR spectra of  $L^3$  and **3**.

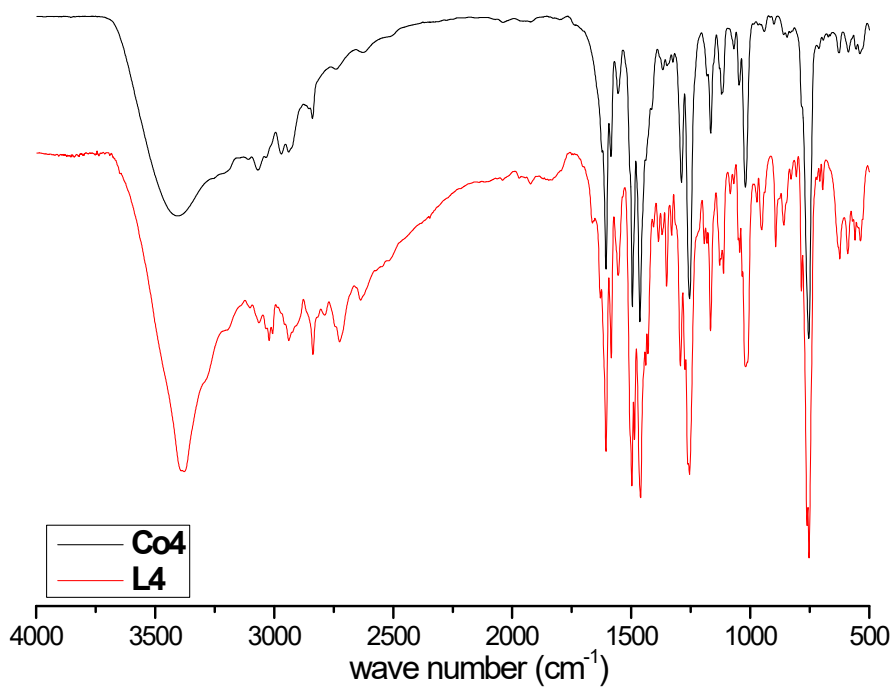

**Figure S24.** IR spectra of  $L^4$  and **4**.

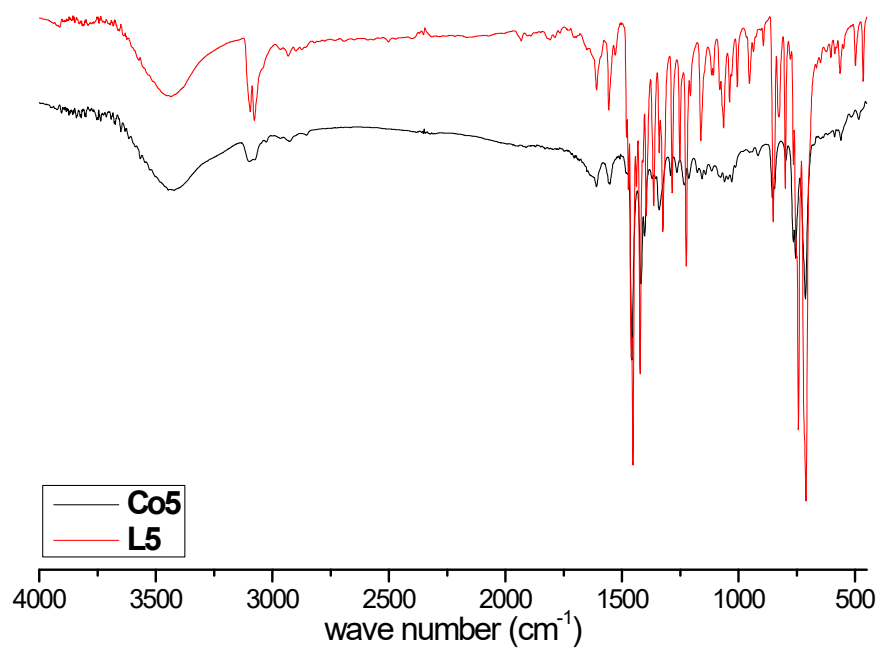

**Figure S25.** IR spectra of L<sup>5</sup> and Co<sup>5</sup>.

### 1.3. ESI-HRMS

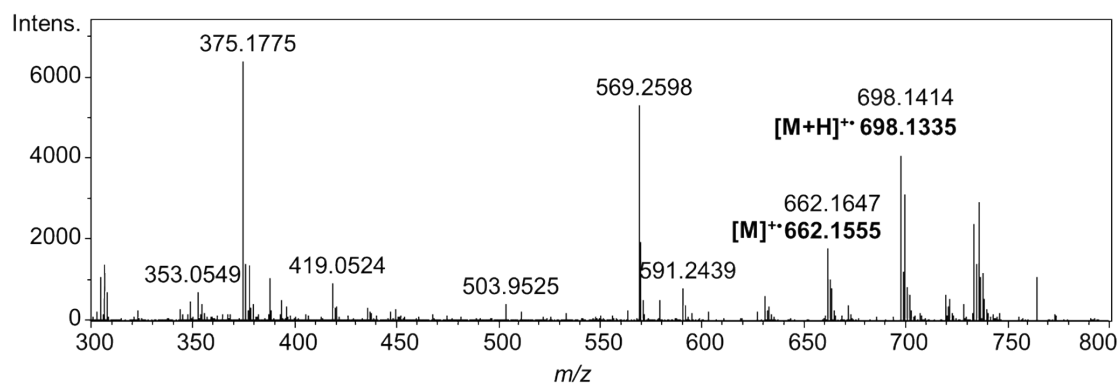

Figure S26. ESI-HRMS of 1.

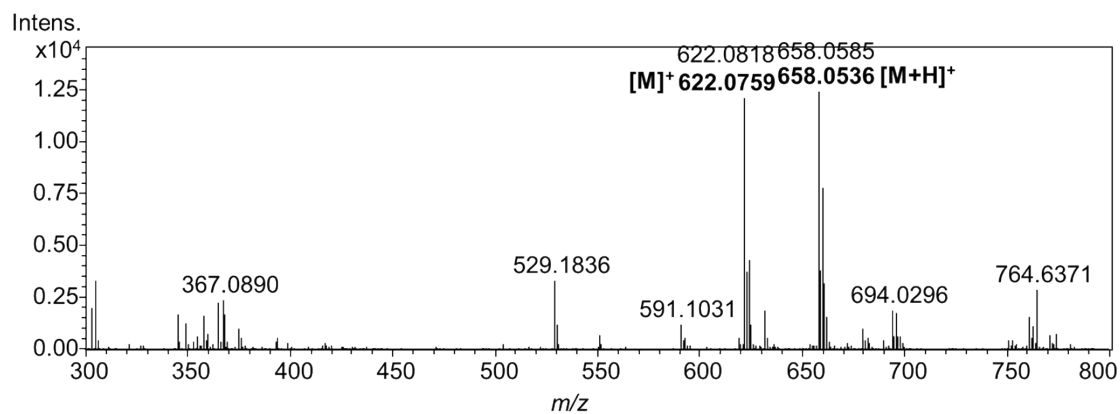

Figure S27. ESI-HRMS of 2.

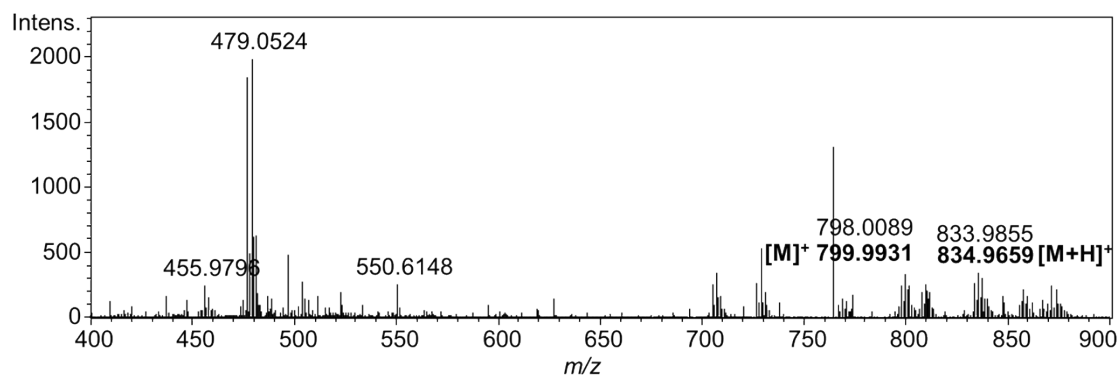

Figure S28. ESI-HRMS of 3.



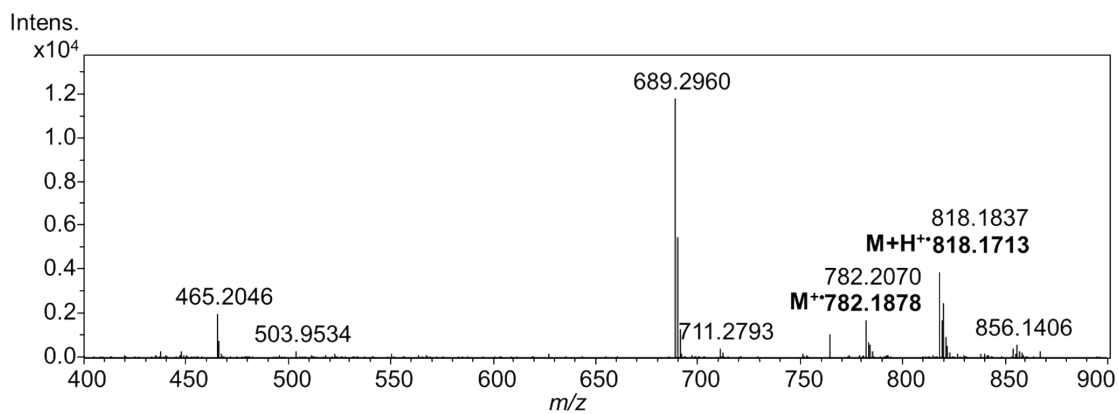

**Figure S29.** ESI-HRMS of 4.

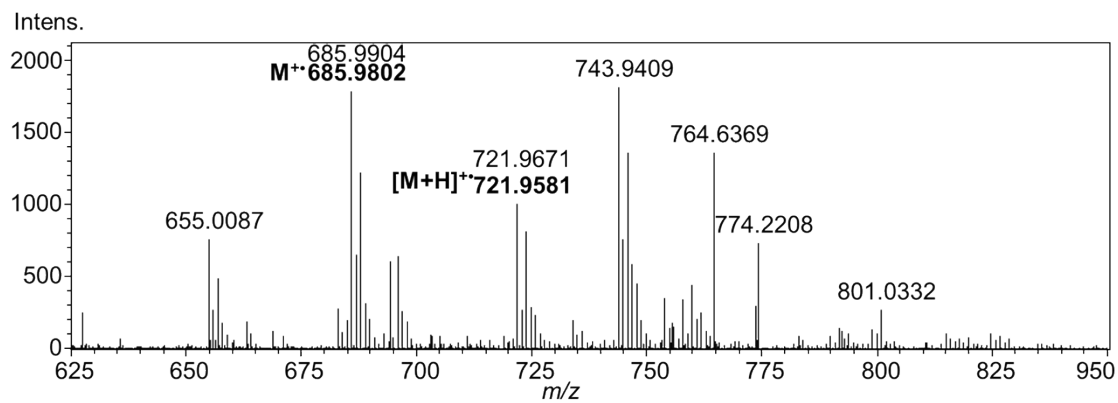

**Figure S30.** ESI-HRMS of 5.

## 1.4. Electronic spectra

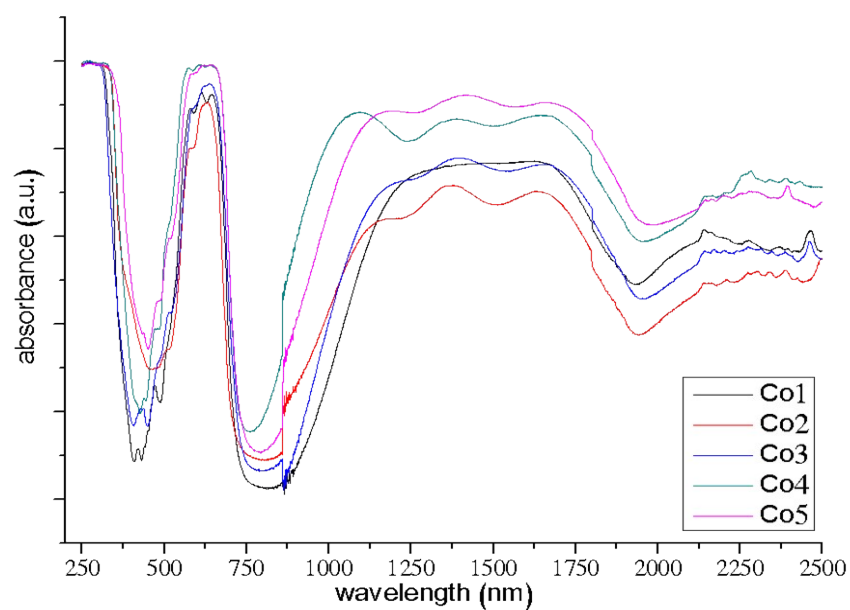

**Figure S31.** Electronic spectra of **1–5**.

**Table S1.** Observed and calculated values of electronic transitions and parameters for **1–5**

| Compound | $\nu_1^a$<br>( $\text{cm}^{-1}$ ) | $\nu_2^a$<br>( $\text{cm}^{-1}$ ) | $\nu_3^a$<br>( $\text{cm}^{-1}$ ) | $B^b$<br>( $\text{cm}^{-1}$ ) | $\beta^c$<br>( $\text{cm}^{-1}$ ) | $\beta^o$<br>(%) <sup>d</sup> | $\Delta_T$<br>( $\text{cm}^{-1}$ ) |
|----------|-----------------------------------|-----------------------------------|-----------------------------------|-------------------------------|-----------------------------------|-------------------------------|------------------------------------|
| <b>1</b> | 4110                              | 6944                              | 16622                             | 748                           | 0.773                             | 29                            | 4,110                              |
| <b>2</b> | 4390                              | 7551                              | 16680                             | 737                           | 0.762                             | 31                            | 4,390                              |
| <b>3</b> | 4260                              | 7335                              | 16356                             | 727                           | 0.751                             | 33                            | 4,260                              |
| <b>4</b> | 4575                              | 7863                              | 16764                             | 726                           | 0.750                             | 33                            | 4,575                              |
| <b>5</b> | 4310                              | 7419                              | 16439                             | 727                           | 0.751                             | 33                            | 4,310                              |

<sup>a</sup>Values of [ $^4A_2 \rightarrow ^4T_2$ ] ( $\nu_1$ ), [ $^4A_2 \rightarrow ^4T_1(F)$ ] ( $\nu_2$ ) and [ $^4A_2 \rightarrow ^4T_1(P)$ ] ( $\nu_3$ ). <sup>b</sup>Interelectronic Racah's repulsion parameter; <sup>c</sup>Nephelauxetic ratio defined as the  $B_{\text{complex}}/B'_{\text{free ion}}$  quotient with  $B'_{\text{free ion}} = 967 \text{ cm}^{-1}$ . <sup>d</sup> $\beta^o = (B_{\text{free ion}} - B_{\text{complex}})/B_{\text{free ion}} \times 100$ .

## 1.5. Thermogravimetric analysis

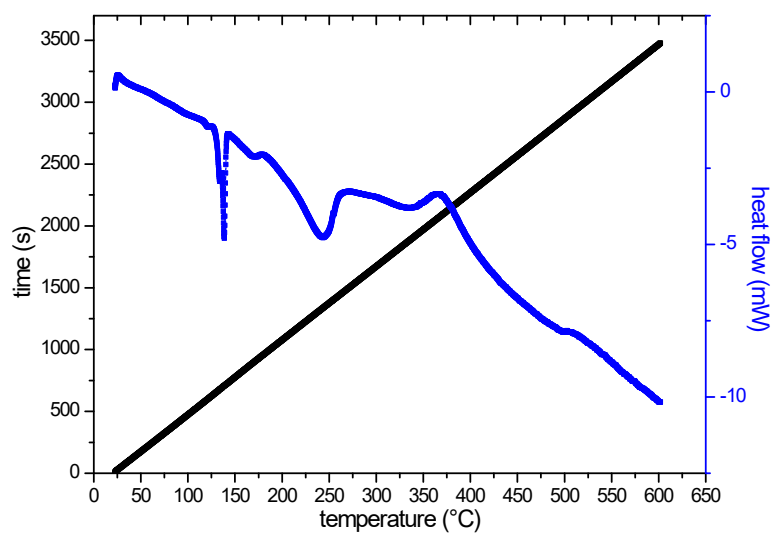

Figure S32. DSC curve of L<sup>1</sup>.

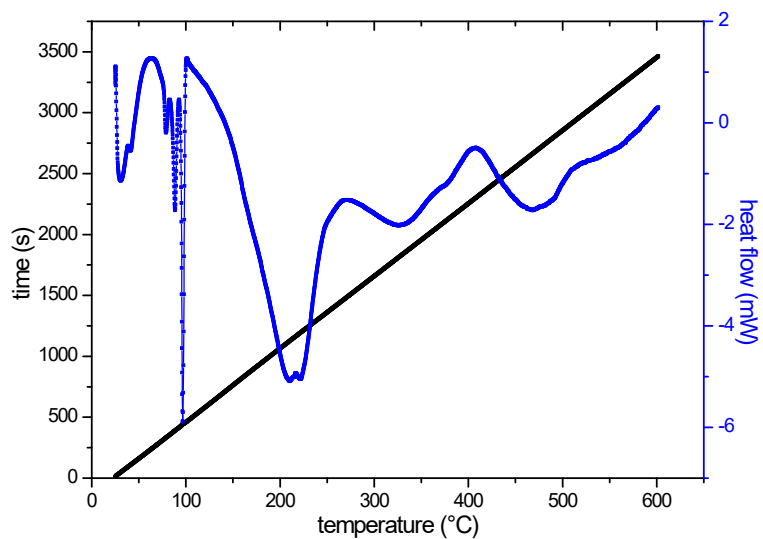

Figure S33. DSC curve of L<sup>2</sup>.

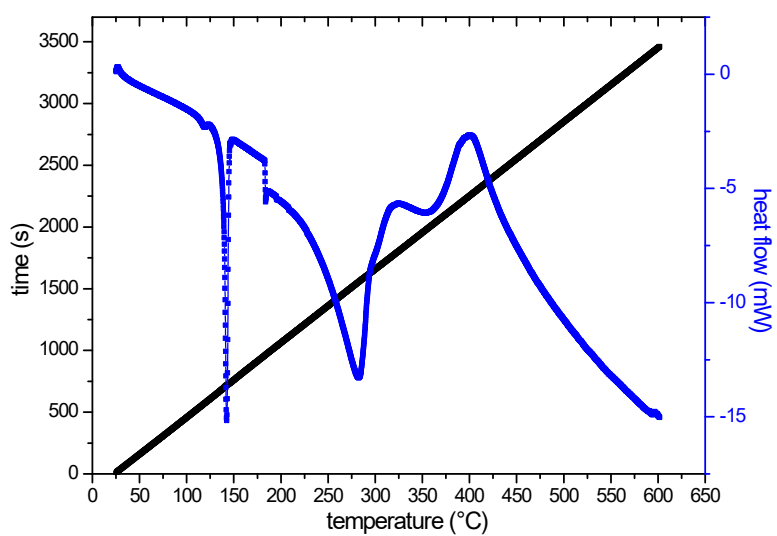

Figure S34. DSC curve of L<sup>3</sup>.

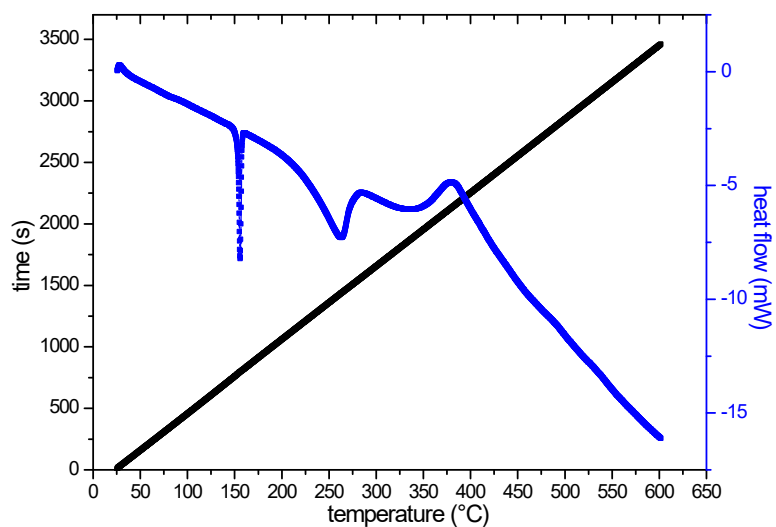

**Figure S35.** DSC curve of L<sup>4</sup>.

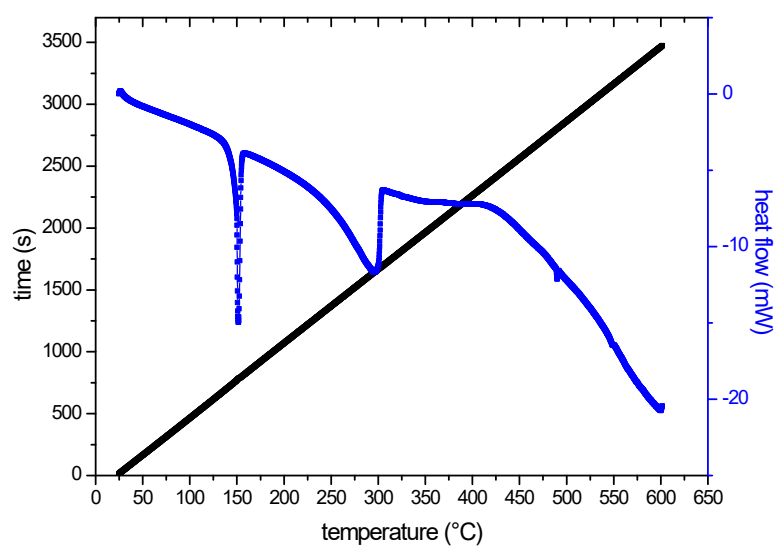

**Figure S36.** DSC curve of L<sup>5</sup>.

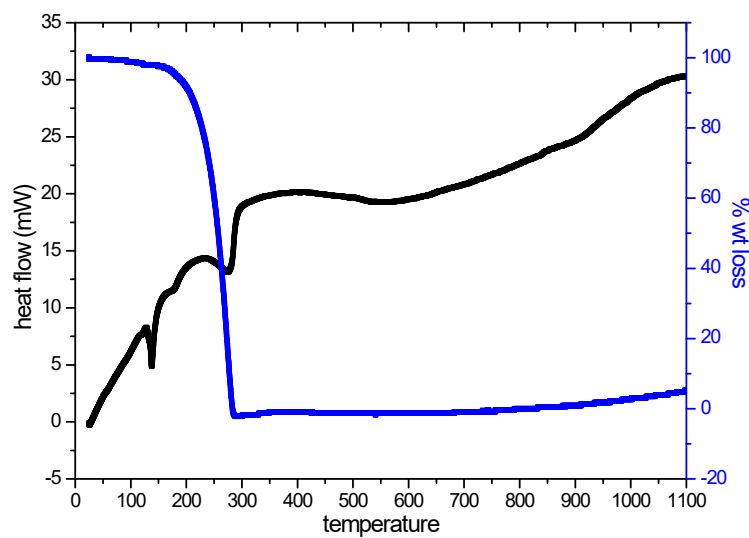

**Figure S37.** TG and DTG curves of L<sup>1</sup>.

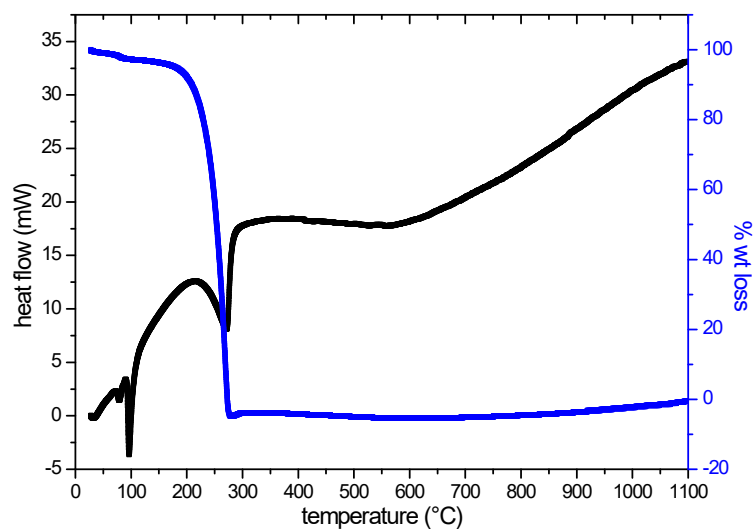

**Figure S38.** TG and DTG curves of L<sup>2</sup>.

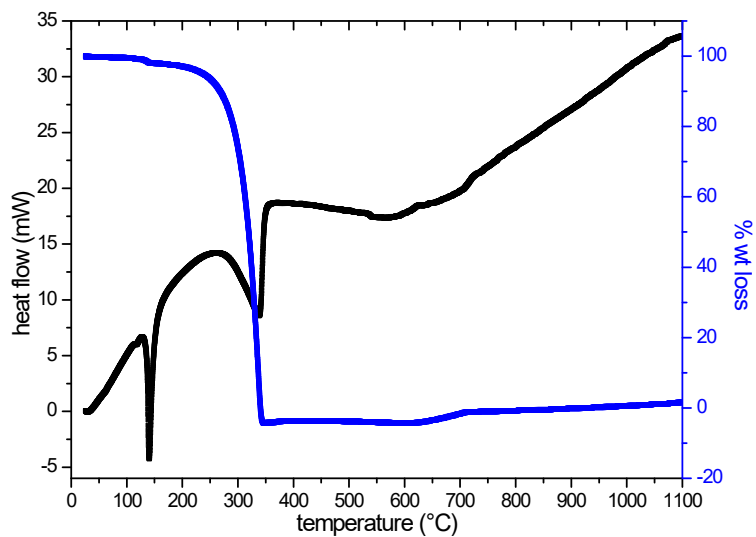

**Figure S39.** TG and DTG curves of L<sup>3</sup>.

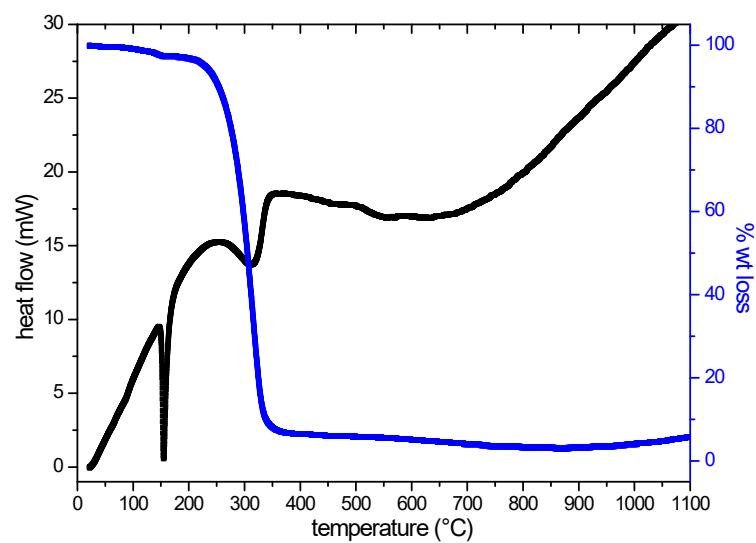

**Figure S40.** TG and DTG curves of L<sup>4</sup>.

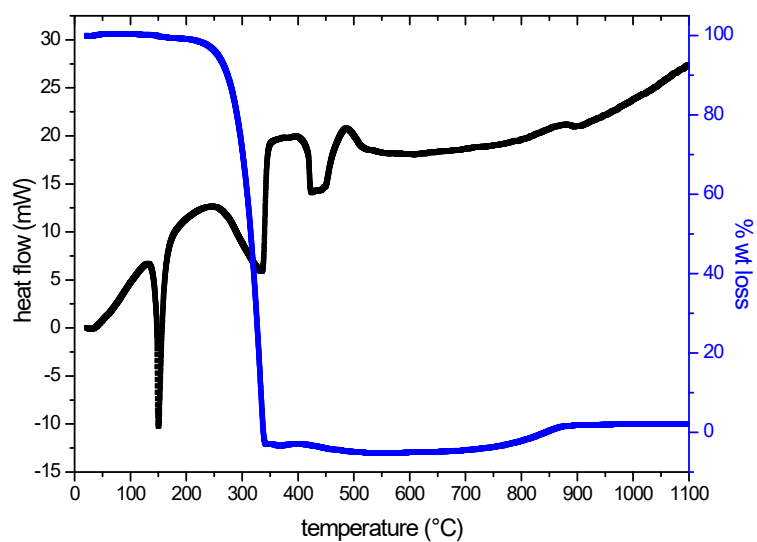

**Figure S41.** TG and DTG curves of L<sup>5</sup>.

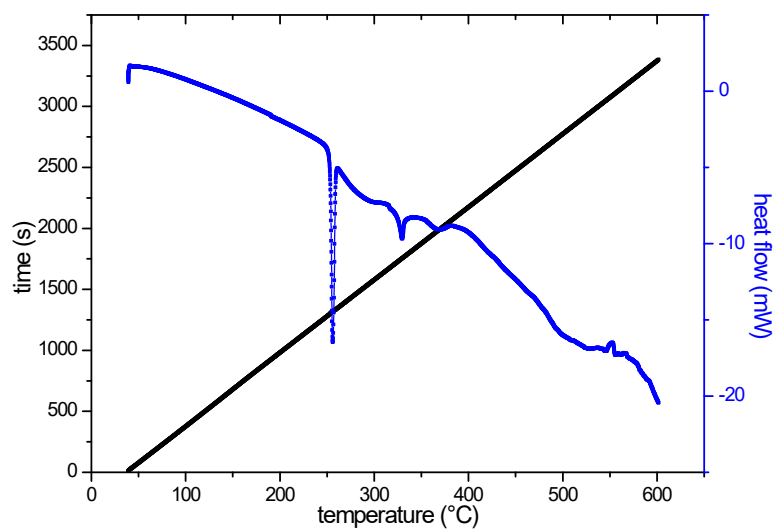

**Figure S42.** DSC curves of Co1.

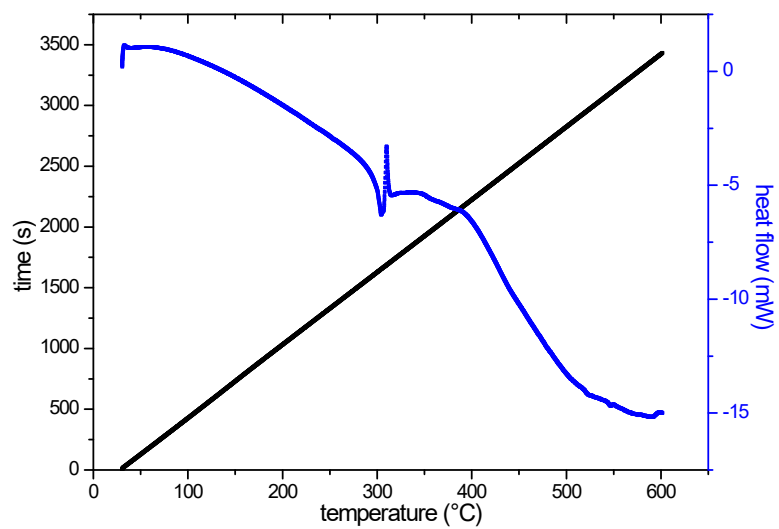

**Figure S43.** DSC curves of Co2.

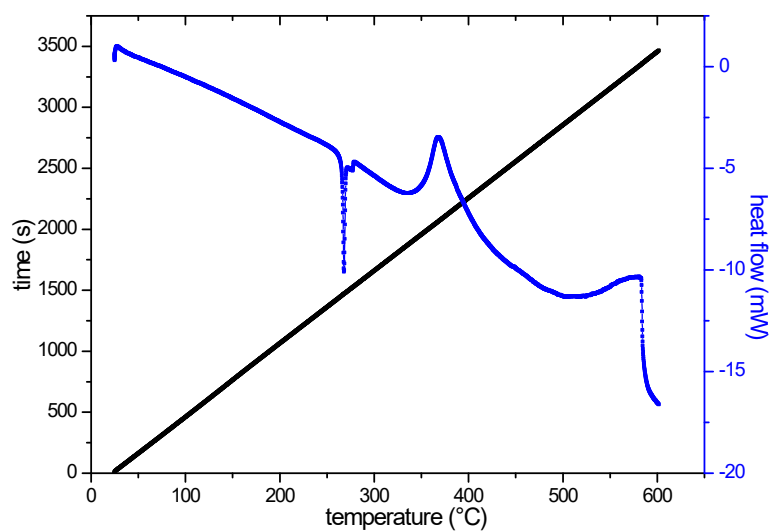

**Figure S44.** DSC curves of Co3.

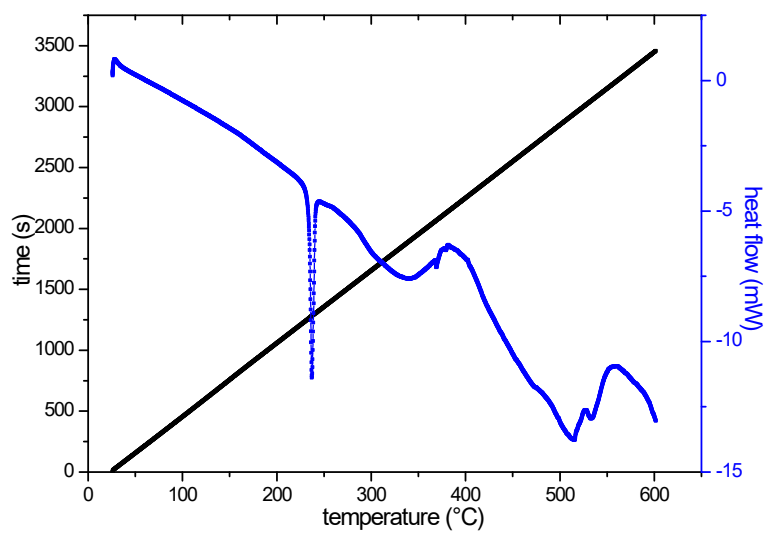

**Figure S45.** DSC curves of Co4.

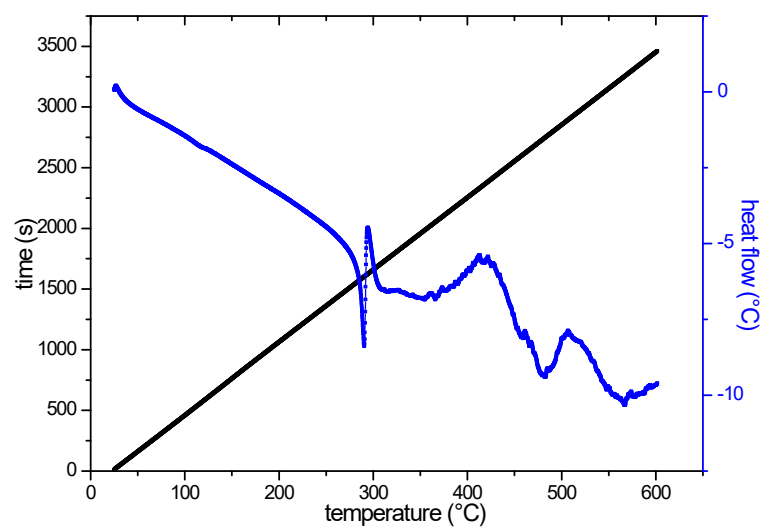

**Figure S46.** DSC curves of Co5.

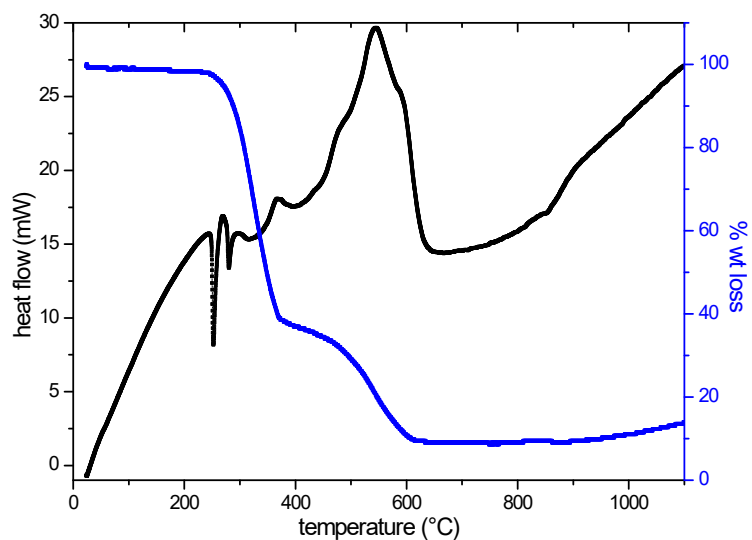

**Figure S47.** TG and DTG curves of Co1.

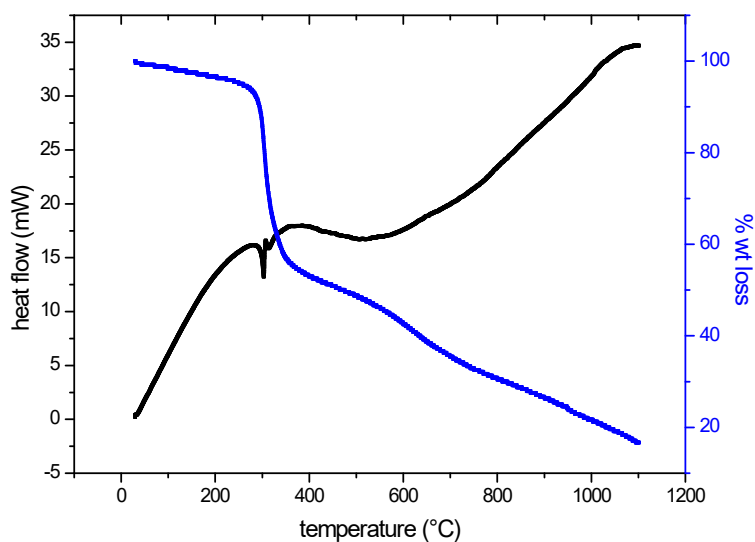

**Figure S48.** TG and DTG curves of Co2.

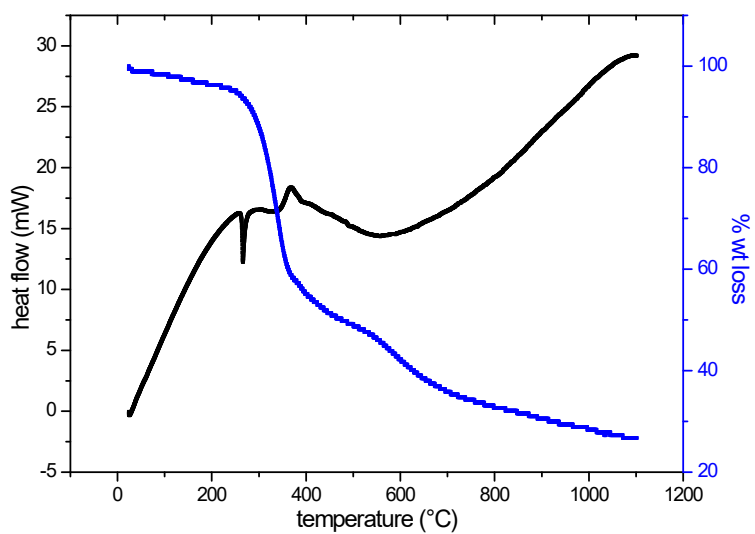

**Figure S49.** TG and DTG curves of Co3.



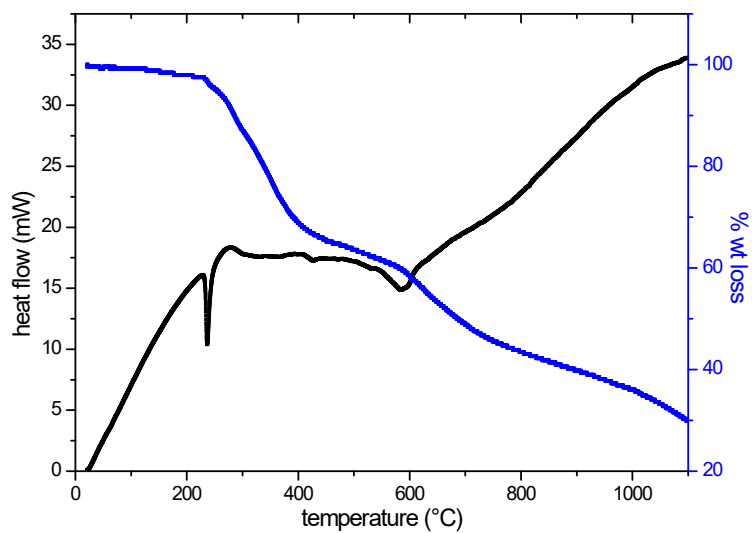

**Figure S50.** TG and DTG curves of Co4.

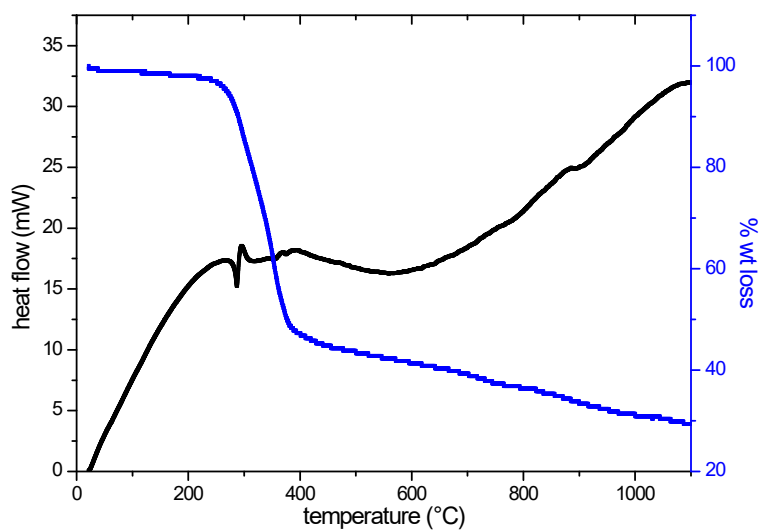

**Figure S51.** TG and DTG curves of Co5.

## 1.6. X-ray crystallographic data collection and crystal structure

**Table S2.** Crystal data and refinement statistics for the structures of **1**, **3**, **4** and **5**.

|                                                  |          | <b>1</b>                                            | <b>3</b>                                            | <b>4</b>                                            | <b>5</b>                                            |
|--------------------------------------------------|----------|-----------------------------------------------------|-----------------------------------------------------|-----------------------------------------------------|-----------------------------------------------------|
| Chemical formula                                 |          | [CoCl <sub>2</sub> (L <sub>1</sub> ) <sub>2</sub> ] | [CoCl <sub>2</sub> (L <sub>3</sub> ) <sub>2</sub> ] | [CoCl <sub>2</sub> (L <sub>4</sub> ) <sub>2</sub> ] | [CoCl <sub>2</sub> (L <sub>5</sub> ) <sub>2</sub> ] |
| Fw (g mol <sup>-1</sup> )                        |          | 698.53                                              | 836.29                                              | 818.63                                              | 722.62                                              |
| Cryst system                                     |          | Triclinic                                           | Orthorhombic                                        | Monoclinic                                          | Monoclinic                                          |
| Space group                                      |          | <i>P</i> -1                                         | <i>Pbca</i>                                         | <i>C</i> 2/ <i>c</i>                                | <i>C</i> 2/ <i>c</i>                                |
| <i>Z</i>                                         |          | 2                                                   | 8                                                   | 8                                                   | 4                                                   |
| <i>T</i> (K)                                     |          | 296(2)                                              | 296(2)                                              | 296(2)                                              | 296(2)                                              |
| Unit cell dimensions                             | <i>a</i> | 10.1122(2)                                          | 18.8282(8)                                          | 46.6731(11)                                         | 15.6162(10)                                         |
|                                                  | <i>b</i> | 11.0132(2)                                          | 9.5569(4)                                           | 11.7655(3)                                          | 11.2424(7)                                          |
|                                                  | <i>c</i> | 16.9563(4)                                          | 42.2102(13)                                         | 14.8882(4)                                          | 19.1016(16)                                         |
|                                                  | $\alpha$ | 81.2620(10)                                         | 90                                                  | 90                                                  | 90                                                  |
|                                                  | $\beta$  | 79.356(2)                                           | 90                                                  | 100.070(2)                                          | 112.182(2)                                          |
|                                                  | $\gamma$ | 65.0490(10)                                         | 90                                                  | 90                                                  | 90                                                  |
| <i>V</i> (Å <sup>3</sup> )                       |          | 1676.87(6)                                          | 7595.3(5)                                           | 8049.6(4)                                           | 3105.3(4)                                           |
| $\rho_{\text{calc}}$ (Mg/m <sup>3</sup> )        |          | 1.383                                               | 1.463                                               | 1.351                                               | 1.546                                               |
| Absorption coefficient $\mu$ (mm <sup>-1</sup> ) |          | 5.747                                               | 7.704                                               | 4.946                                               | 1.025                                               |
| $\theta$ range for data collection (°)           |          | 4.988-66.590                                        | 2.093-66.607                                        | 1.923-66.409                                        | 2.303-25.408                                        |
| Index ranges                                     | <i>h</i> | -12 to 11                                           | -21 to 22                                           | -54 to 54                                           | -17 to 18                                           |
|                                                  | <i>k</i> | -12 to 13                                           | -11 to 5                                            | -13 to 7                                            | -13 to 10                                           |
|                                                  | <i>l</i> | -13 to 20                                           | -48 to 49                                           | -17 to 17                                           | -23 to 23                                           |
| Observed reflections                             |          | 5778                                                | 6579                                                | 6970                                                | 2859                                                |
| [ <i>I</i> > 2 $\sigma$ ( <i>I</i> )]            |          |                                                     |                                                     |                                                     |                                                     |
| Unique reflections                               |          | 4344                                                | 3692                                                | 3179                                                | 2383                                                |
| Symmetry factor ( <i>R</i> <sub>int</sub> )      |          | 0.0421                                              | 0.1354                                              | 0.1483                                              | 0.0418                                              |
| Completeness to $\theta_{\text{max}}$ (%)        |          | 97.6                                                | 98.0                                                | 98.6                                                | 99.7                                                |
| <i>F</i> (000)                                   |          | 722                                                 | 3400                                                | 3400                                                | 1476                                                |
| Refined parameters                               |          | 424                                                 | 460                                                 | 497                                                 | 231                                                 |

|                                                  |              |              |              |              |
|--------------------------------------------------|--------------|--------------|--------------|--------------|
| Goodness-of-fit on $F^2$ ( $S$ ) <sup>a</sup>    | 1.023        | 1.108        | 1.029        | 1.069        |
| Final $R_I^b$ factor [ $I > 2\sigma(I)$ ]        | 0.0421       | 0.0620       | 0.0986       | 0.0876       |
| $wR_2^c$ factor (all data)                       | 0.1103       | 0.1721       | 0.3267       | 0.3057       |
| Largest diff. peak/hole ( $e \text{ \AA}^{-3}$ ) | 0.244/-0.263 | 0.682/-0.352 | 0.959/-0.479 | 0.984/-0.964 |
| CCDC deposit no.                                 | 1822401      | 1822403      | 1822402      | 1822400      |

$${}^a S = \left[ \frac{\sum w_{hkl} (F_{(hkl)\text{obs}}^2 - F_{(hkl)\text{calc}}^2)^2}{|N_r - N_p|} \right]^{1/2}, {}^b R = \frac{\sum ||F_{(hkl)\text{obs}}| - |F_{(hkl)\text{calc}}||}{\sum |F_{(hkl)\text{obs}}|}, {}^c wR_2 = \left[ \frac{\sum w_{hkl} (F_{(hkl)\text{obs}}^2 - F_{(hkl)\text{calc}}^2)^2}{\sum w_{hkl} F_{(hkl)\text{obs}}^2} \right]^{1/2}.$$

**Table S3.** Selected bond lengths ( $\text{\AA}$ ) and angles ( $^\circ$ ) for compounds **1**, **3**, **4** and **5**<sup>a,b</sup>

|                           | <b>1</b>  | <b>3</b>   | <b>4</b>   | <b>5</b>   |
|---------------------------|-----------|------------|------------|------------|
| Co1-N1A                   | 2.041(2)  | 2.037(4)   | 2.056(6)   | 2.024(4)   |
| Co1-N1B                   | 2.053(2)  | 2.052(4)   | 2.005(7)   | 2.024(4)   |
| Co1-Cl1                   | 2.2600(9) | 2.2331(15) | 2.252(3)   | 2.2552(15) |
| Co1-Cl2                   | 2.2601(9) | 2.2584(15) | 2.237(3)   | 2.2552(15) |
| N1A-Co1-N1B ( $\alpha$ )  | 121.20(9) | 113.92(16) | 110.0(3)   | 109.8(2)   |
| Cl1-Co1-Cl2 ( $\beta$ )   | 111.95(4) | 108.09(7)  | 119.12(10) | 109.99(12) |
| N1A-Co1-Cl1 ( $\tau_1$ )  | 97.74(7)  | 110.64(12) | 98.18(18)  | 106.21(11) |
| N1B-Co1-Cl2 ( $\tau_1'$ ) | 98.67(7)  | 114.20(12) | 102.9(2)   | 106.21(11) |
| N1A-Co1-Cl2 ( $\tau_2$ )  | 114.80(7) | 105.49(12) | 107.67(19) | 112.34(11) |
| N1B-Co1-Cl1 ( $\tau_2'$ ) | 113.16(7) | 104.45(11) | 118.4(2)   | 112.34(11) |

<sup>a</sup> In the structure of **4**, N1A = N1, N1B = N1<sup>i</sup> and Cl2 = Cl1<sup>i</sup> [Symmetry code: (i) = 2-x, y, 1/2-z]. <sup>b</sup>The meaning of the  $\alpha$ ,  $\beta$ ,  $\tau_1$ ,  $\tau_1'$ ,  $\tau_2$ , and  $\tau_2'$  parameters is illustrated in Figure 2 (see below).

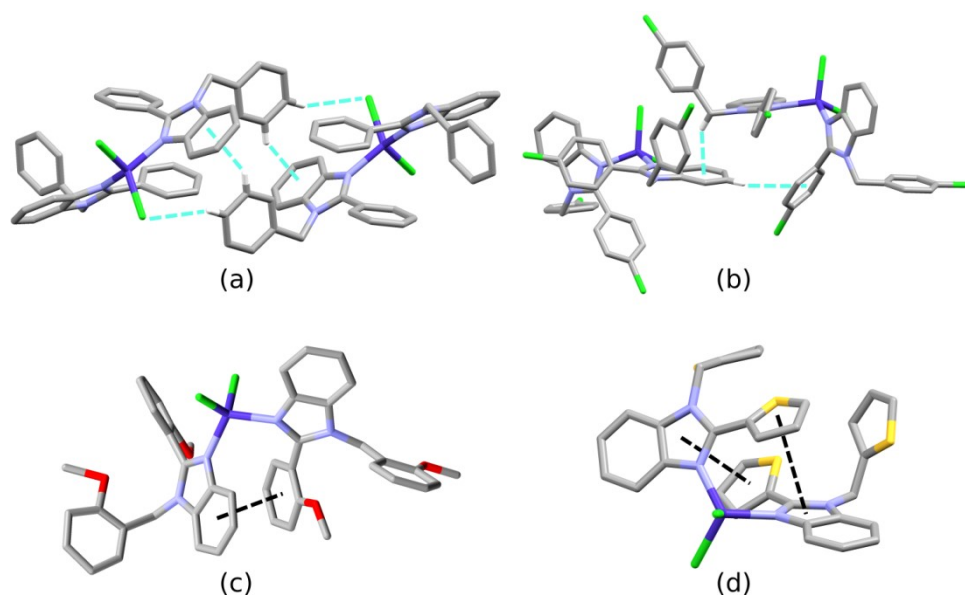

**Figure S52.** Intermolecular and intramolecular interactions driving drove a so-called locked geometry in coordination compounds found in **1** (a), **3** (b), **4** (c) and **5** (d). Dashed cyan lines indicates C-H... $\pi$  and C-H...Cl type interactions, while dashed black lines represent the  $\pi$ ... $\pi$  contacts.

## 1.7. EPR spectra and theoretical calculations

**Table S4.** Theoretical magnetic parameters evaluated for **1–5**

| Compound | Effective SOC Hamiltonian <sup>a</sup> |                         |       | 2 <sup>nd</sup> order perturbative SOC <sup>a</sup> |       |
|----------|----------------------------------------|-------------------------|-------|-----------------------------------------------------|-------|
|          | $g_x, g_y, g_z$                        | $D$ (cm <sup>-1</sup> ) | $E/D$ | $D$ (cm <sup>-1</sup> )                             | $E/D$ |
| <b>1</b> | 2.254, 2.258, 2.338                    | -6.81                   | 0.012 | -6.82                                               | 0.024 |
| <b>2</b> | 2.252, 2.265, 2.293                    | -2.63                   | 0.197 | +3.29                                               | 0.298 |
| <b>3</b> | 2.264, 2.280, 2.284                    | +1.86                   | 0.043 | +2.60                                               | 0.066 |
| <b>4</b> | 2.216, 2.286, 2.314                    | +9.98                   | 0.200 | +9.62                                               | 0.198 |
| <b>5</b> | 2.266, 2.274, 2.284                    | -2.03                   | 0.277 | +2.79                                               | 0.286 |

<sup>a</sup>Values obtained by means of CAS/NEVPT2 calculations.

**Table S5.** Theoretical components of the  $g$ -factor evaluated for ground and excited Kramers doublet of **1–5**

| Compound | Ground Kramers doublet <sup>a</sup> |       |       | Excited Kramers doublet <sup>a</sup> |       |       |
|----------|-------------------------------------|-------|-------|--------------------------------------|-------|-------|
|          | $g_1$                               | $g_2$ | $g_3$ | $g_1$                                | $g_2$ | $g_3$ |
| <b>1</b> | 0.072                               | 0.084 | 7.016 | 2.351                                | 4.435 | 4.590 |
| <b>2</b> | 1.138                               | 1.387 | 6.636 | 2.059                                | 3.139 | 5.655 |
| <b>3</b> | 2.249                               | 4.271 | 4.855 | 0.284                                | 0.298 | 6.791 |
| <b>4</b> | 1.974                               | 3.185 | 5.799 | 1.166                                | 1.398 | 6.424 |
| <b>5</b> | 1.456                               | 1.877 | 6.426 | 1.853                                | 2.663 | 5.997 |

<sup>a</sup>Values obtained by means of CAS/NEVPT2 calculations.

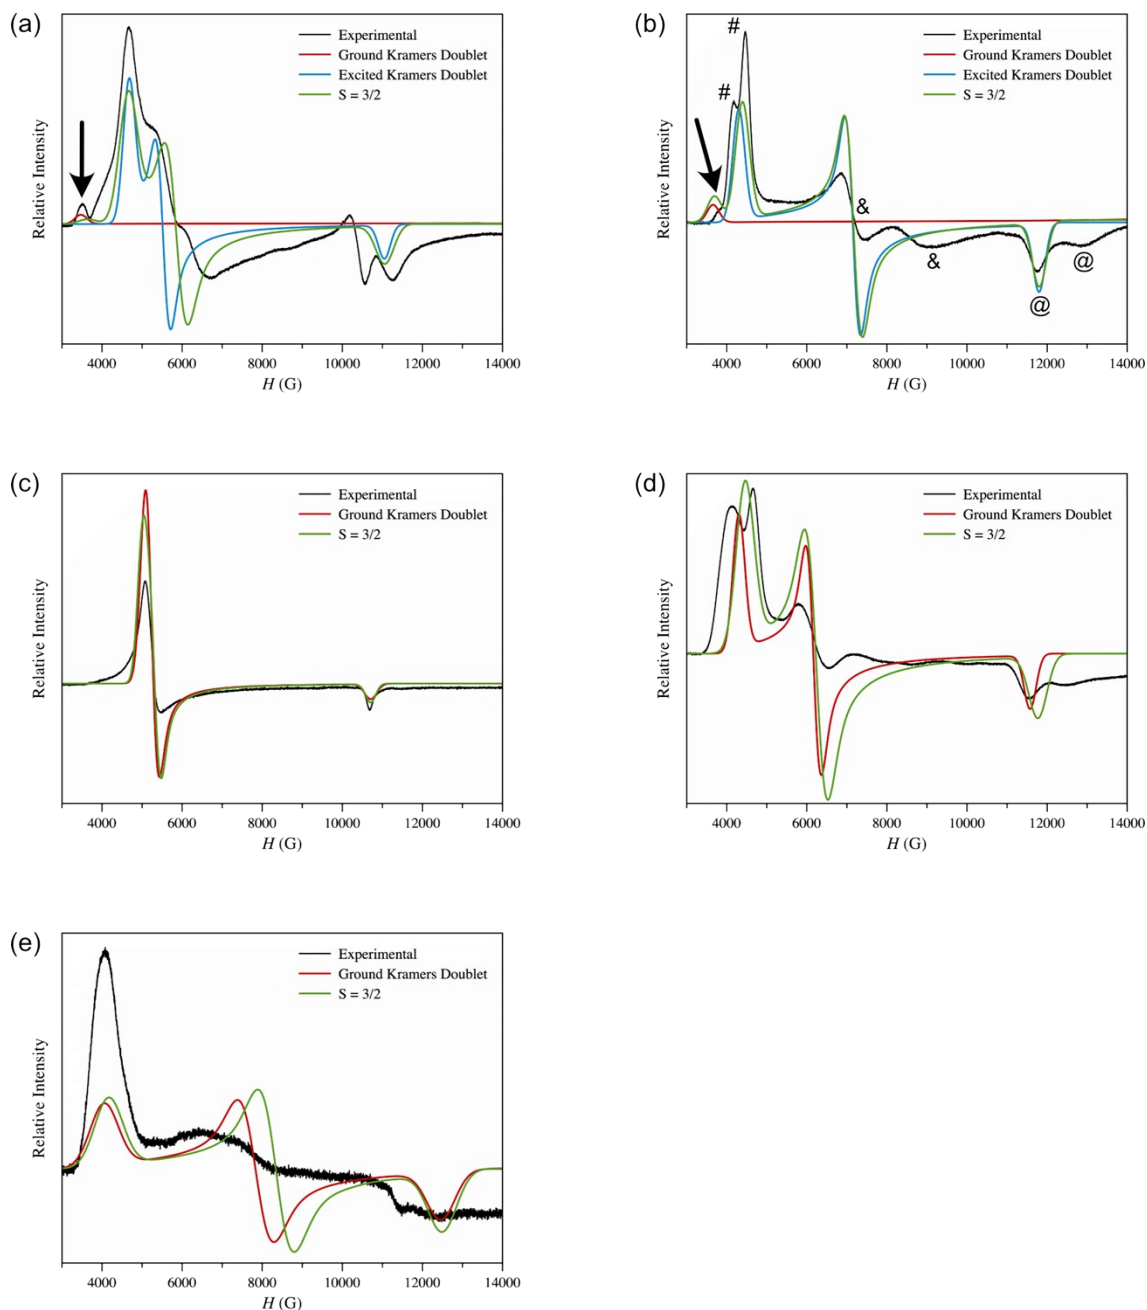

**Figure S53.** Experimental Q-band EPR spectra for **1-5** form (a) to (c) and their simulations from a zfs model applied on a  $S = 3/2$  state or the ground (GKD) and excited (EKD) Kramers doublet through an effective spin ( $S_{\text{eff}} = 1/2$ ) model. The simulations were done using the next values: (a) zfs:  $g_x = 2.354$ ,  $g_y = 2.358$ ,  $g_z = 2.358$ ,  $D = -6.66 \text{ cm}^{-1}$ , and  $E/D = 0.077$ ; GKD:  $g_1 = 1.00$ ,  $g_2 = 1.00$ , and  $g_3 = 7.00$ ; EKD:  $g_1 = 2.20$ ,  $g_2 = 4.40$ , and  $g_3 = 5.20$ ; (b) zfs:  $g_x = 2.246$ ,  $g_y = 2.274$ ,  $g_z = 2.290$ ,  $D = -3.09 \text{ cm}^{-1}$ , and  $E/D = 0.159$ ; GKD:  $g_1 = 1.14$ ,  $g_2 = 1.39$ , and  $g_3 = 6.64$ ; EKD:  $g_1 = 2.06$ ,  $g_2 = 3.40$ , and  $g_3 = 5.65$ ; (c) zfs:  $g_x = 2.364$ ,  $g_y = 2.380$ ,  $g_z = 2.271$ ,  $D = +2.86 \text{ cm}^{-1}$ , and  $E/D = 0.018$ ; GKD:  $g_1 = 2.27$ ,  $g_2 = 4.70$ , and  $g_3 = 4.70$ ; (d) zfs:  $g_x = 2.316$ ,  $g_y = 2.386$ ,  $g_z = 2.131$ ,  $D = +9.47 \text{ cm}^{-1}$ , and  $E/D = 0.102$ ; GKD:  $g_1 = 2.10$ ,  $g_2 = 3.94$ , and  $g_3 = 5.65$ ; (e) zfs:  $g_x = 2.284$ ,  $g_y = 2.274$ ,  $g_z = 2.266$ ,  $D = +4.81 \text{ cm}^{-1}$ , and  $E/D = 0.230$ ; GKD:  $g_1 = 1.95$ ,  $g_2 = 3.10$ , and  $g_3 = 6.00$ . The arrows point out the presence of a weak high magnetic field signal corresponding to the  $m_S = \pm 1/2$  Kramers doublet. This notation, valid only for a null value of the  $E/D$  ratio, is used only to make easier the discussion.

## 1.8. Magnetic measurements

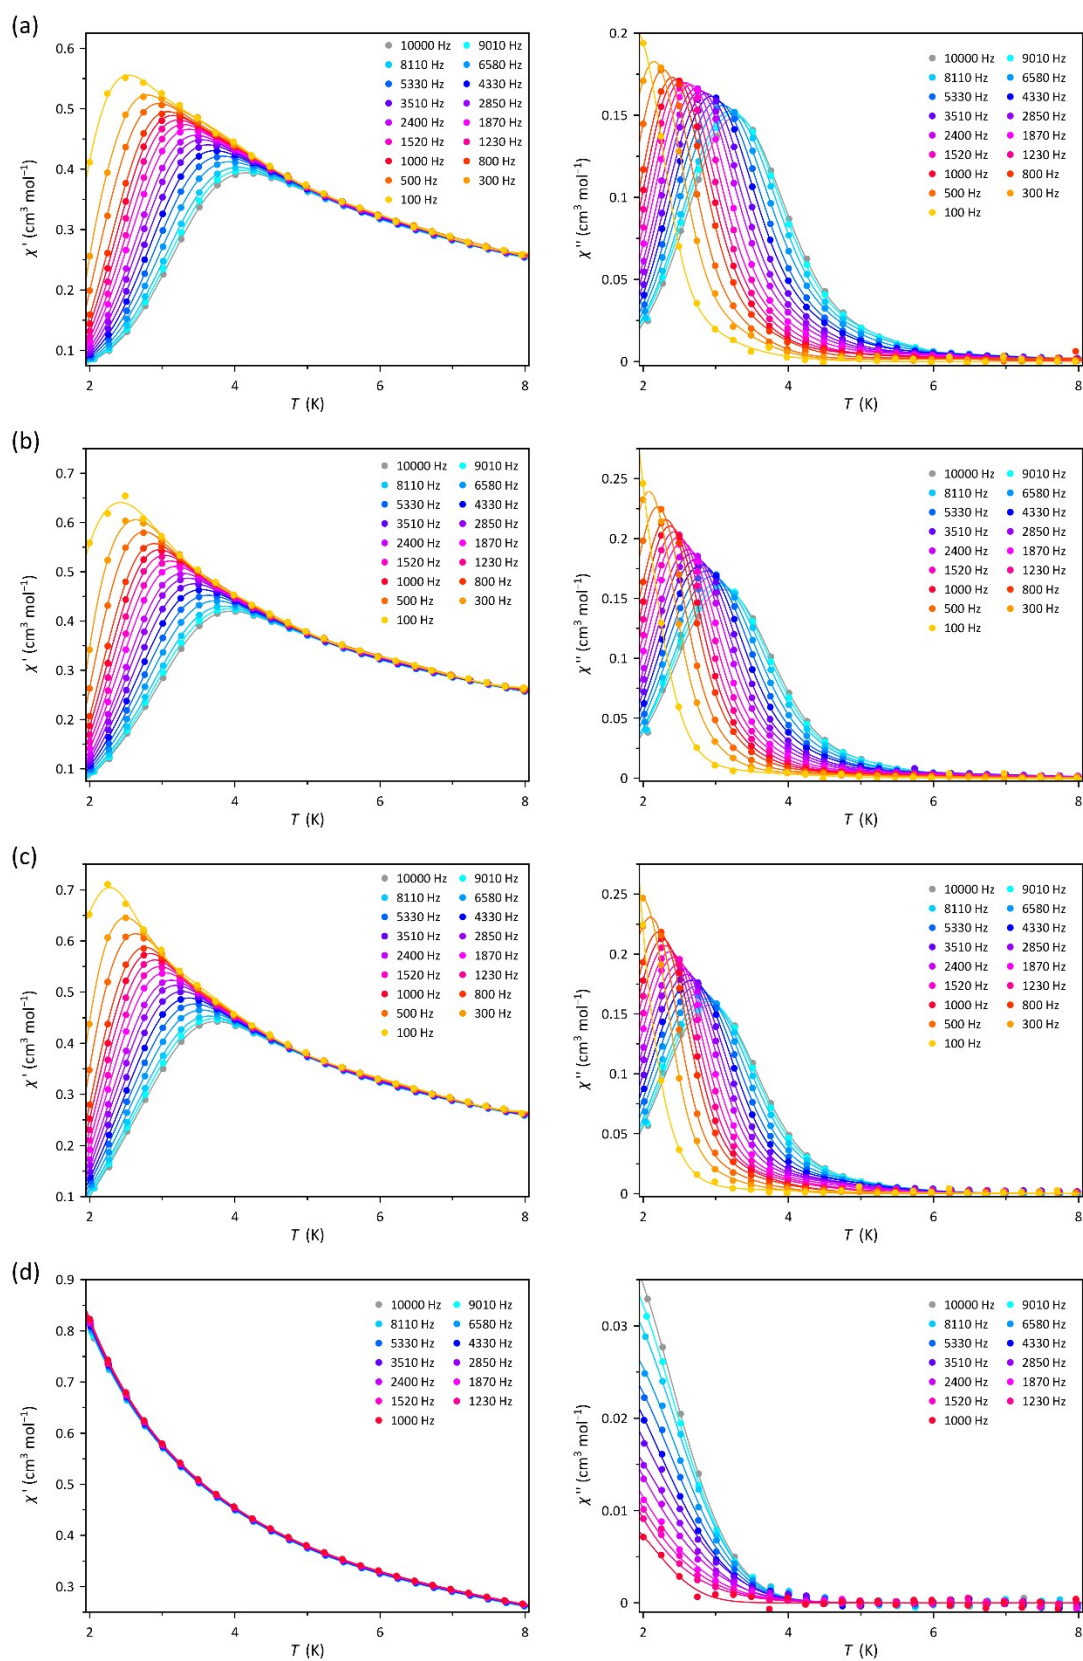

**Figure S54.** Temperature dependence of  $\chi_M'$  (left) and  $\chi_M''$  (right) for **1** at a  $\pm 5.0$  G oscillating field in the frequency range 0.3–10.0 kHz (gray to orange) under applied static magnetic fields of 2.5 (a), 1.0 (b), 0.5 (c) and 0 kOe (d). The solid lines are only eye-guides.

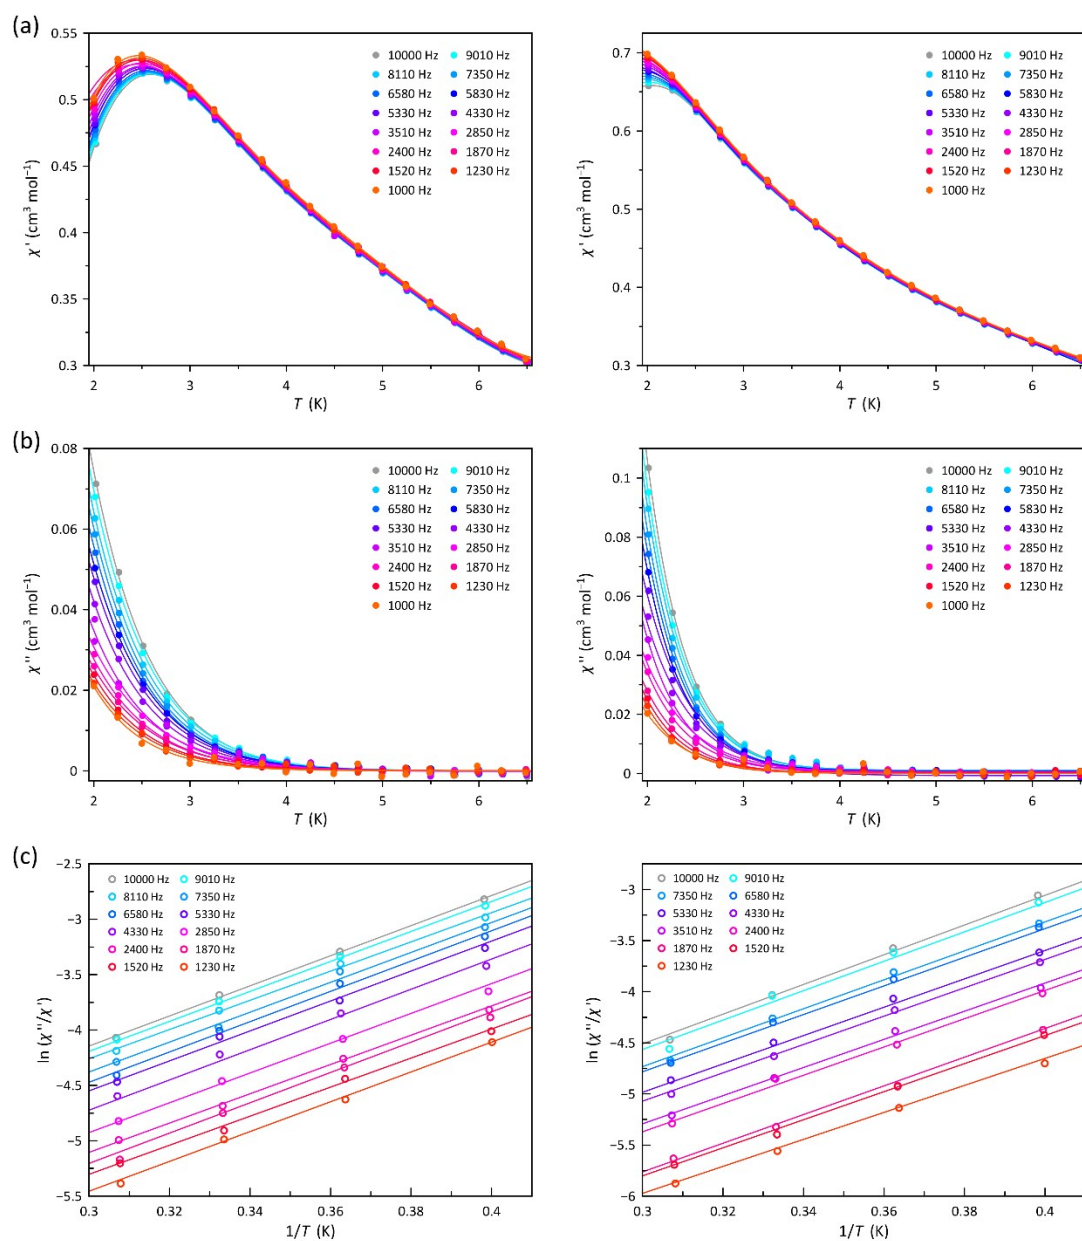

**Figure S55.** Temperature dependence of (a)  $\chi_M'$ , (b)  $\chi_M''$ , and (c)  $\ln(\chi_M''/\chi_M')$  for **2** at a  $\pm 5.0$  G oscillating field in the frequency range 1.0–10.0 kHz (gray to orange) under applied static magnetic fields of 5.0 (left) and 2.5 kOe (right). The solid lines are only eye-guides.



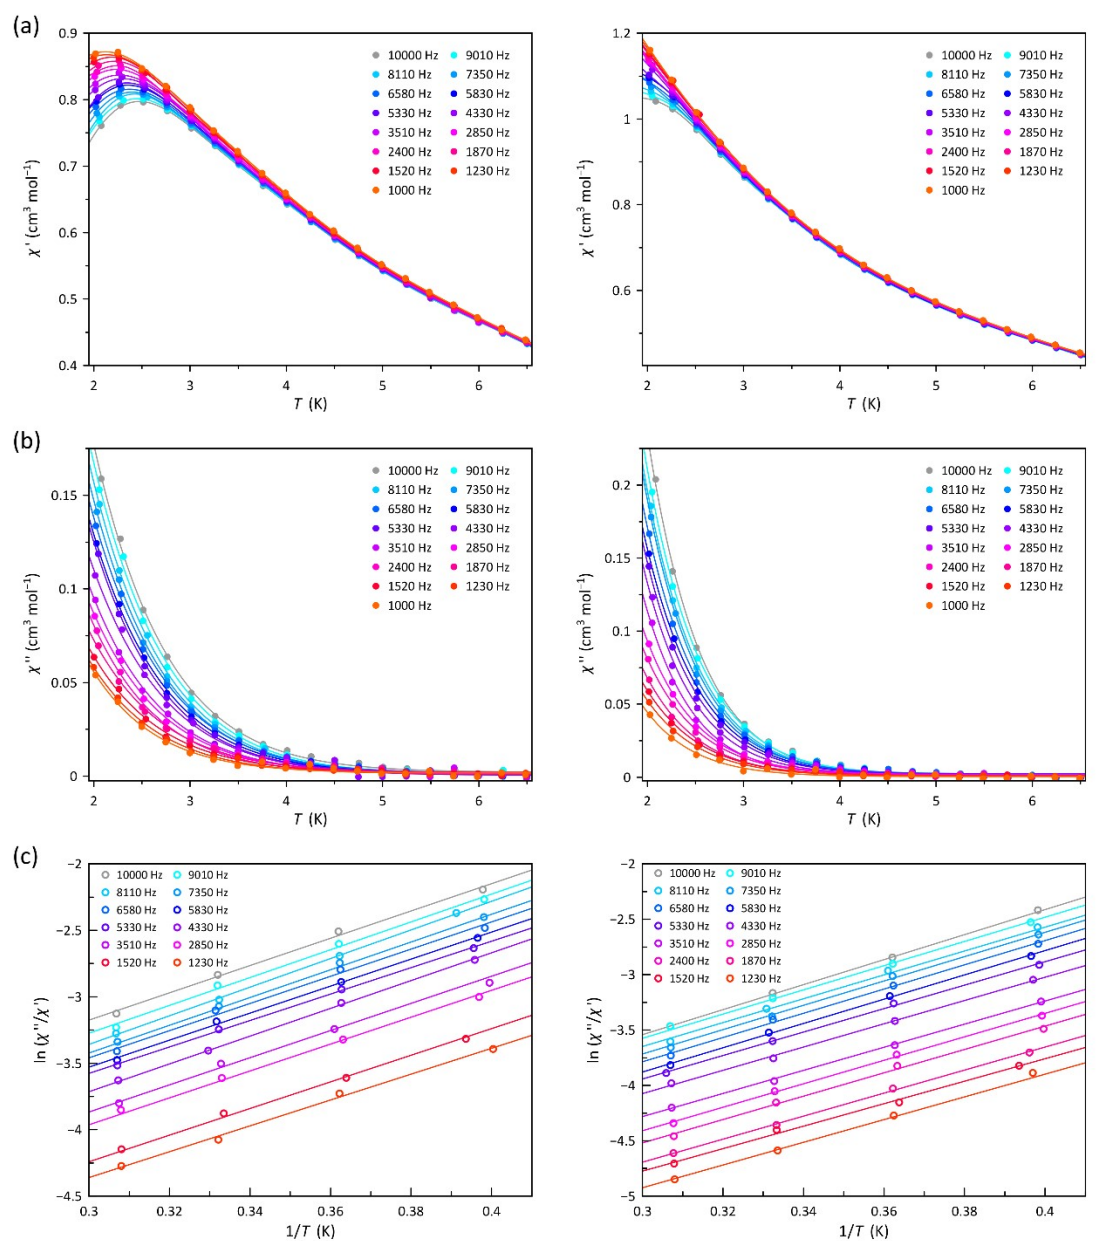

**Figure S56.** Temperature dependence of (a)  $\chi_M'$ , (b)  $\chi_M''$ , and (c)  $\ln(\chi_M''/\chi_M')$  for **3** at a  $\pm 5.0$  G oscillating field in the frequency range 1.0–10.0 kHz (gray to orange) under applied static magnetic fields of 5.0 (left) and 2.5 kOe (right). The solid lines are only eye-guides.

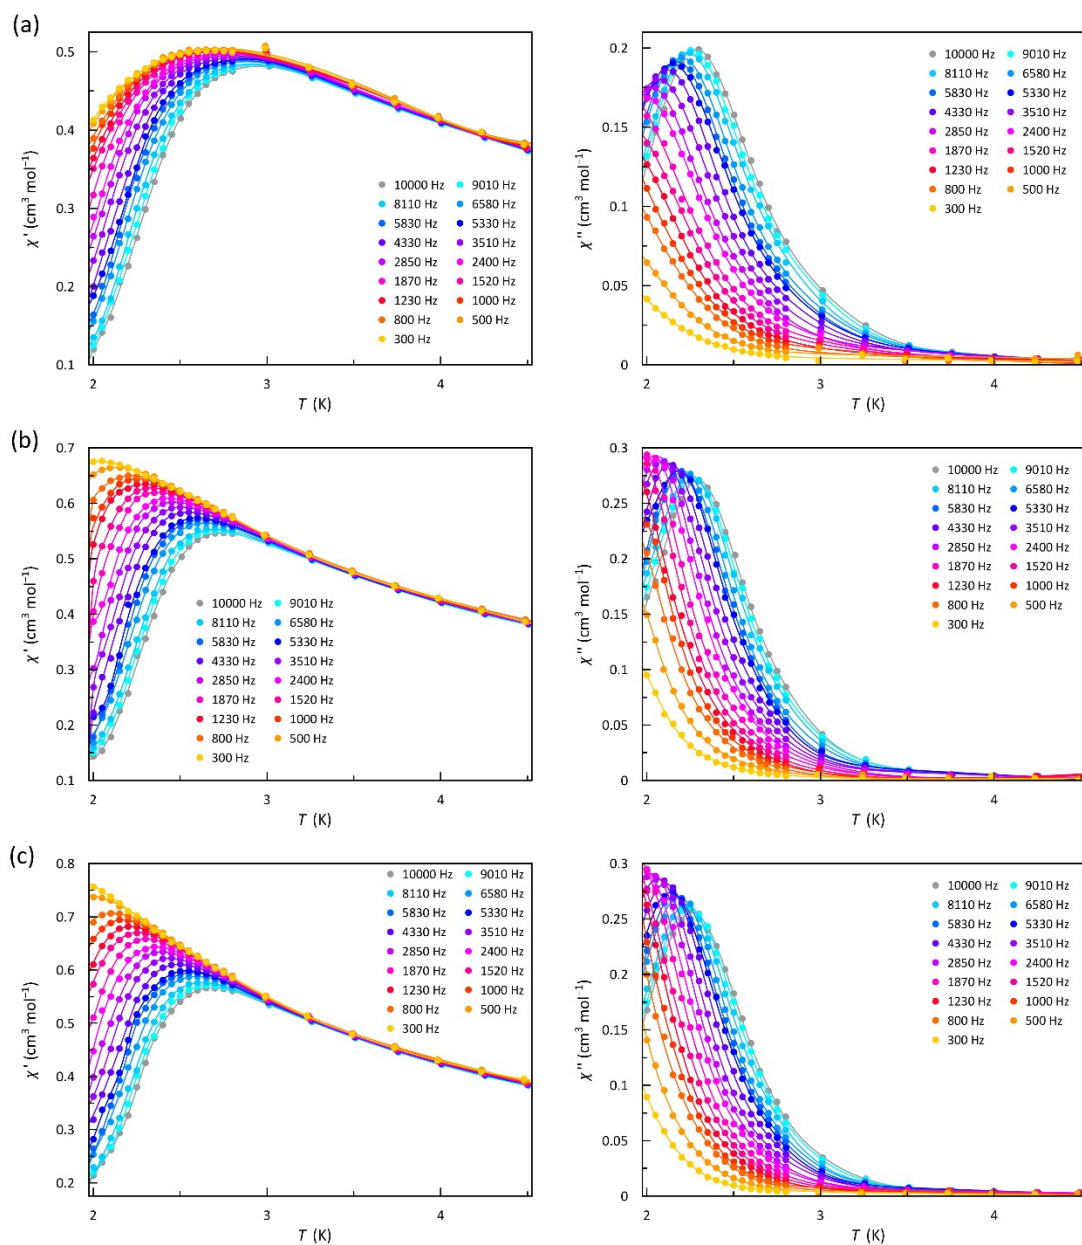

**Figure S57.** Temperature dependence of  $\chi_M'$  (left) and  $\chi_M''$  (right) for **4** at a  $\pm 5.0$  G oscillating field in the frequency range 0.3–10.0 kHz (gray to orange) under applied static magnetic fields of 2.5 (a), 1.0 (b) and 0.5 kOe (c). The solid lines are only eye-guides.

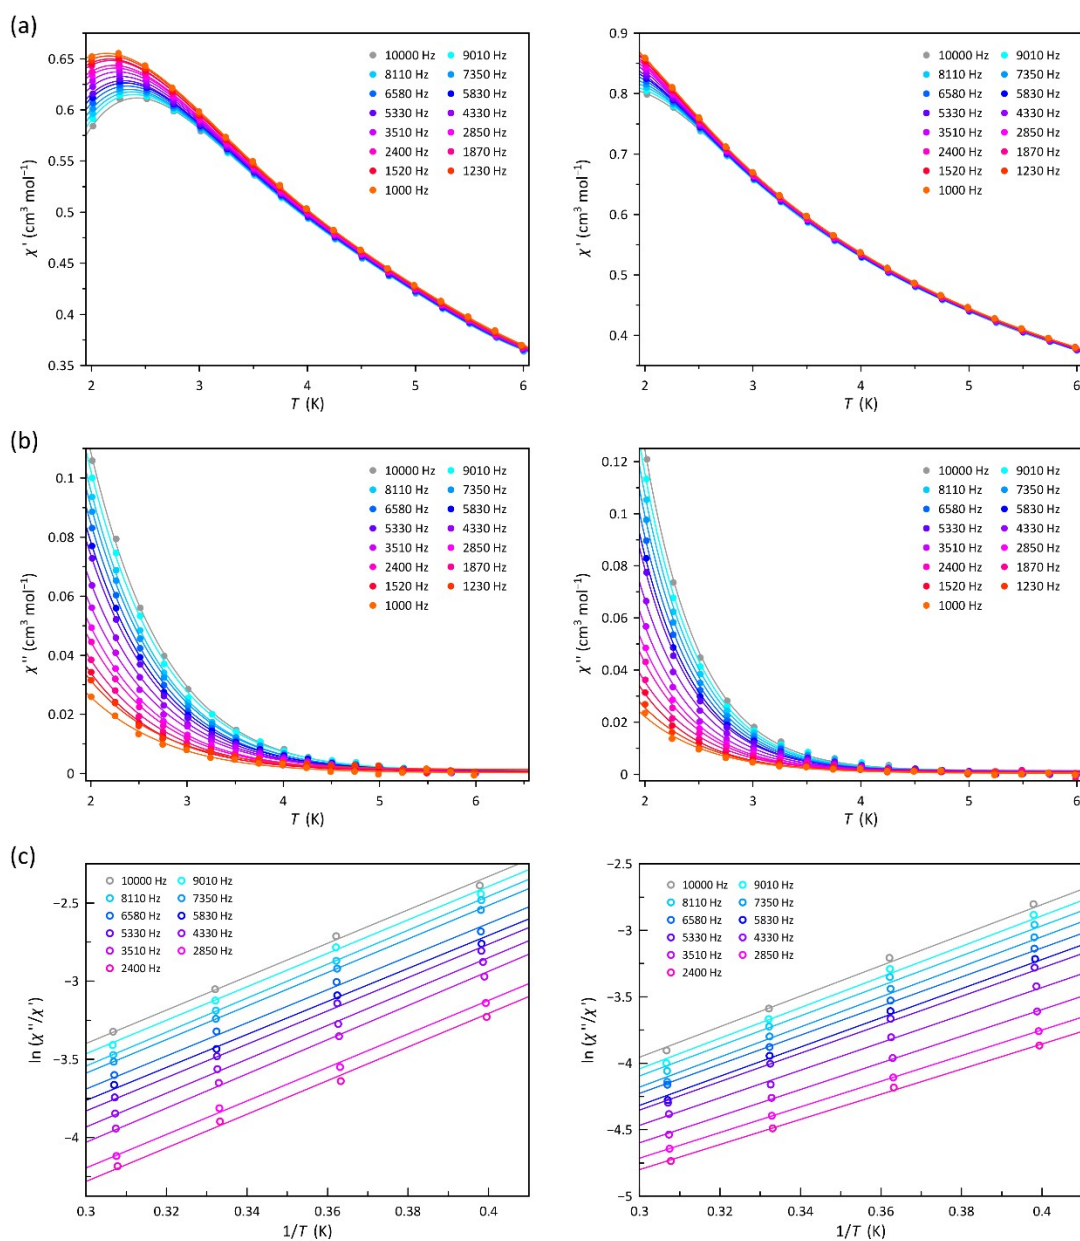

**Figure S58.** Temperature dependence of (a)  $\chi_M'$ , (b)  $\chi_M''$ , and (c)  $\ln(\chi_M''/\chi_M')$  for **5** at a  $\pm 5.0$  G oscillating field in the frequency range 1.0–10.0 kHz (gray to orange) under applied static magnetic fields of 5.0 (left) and 2.5 kOe (right). The solid lines are only eye-guides.

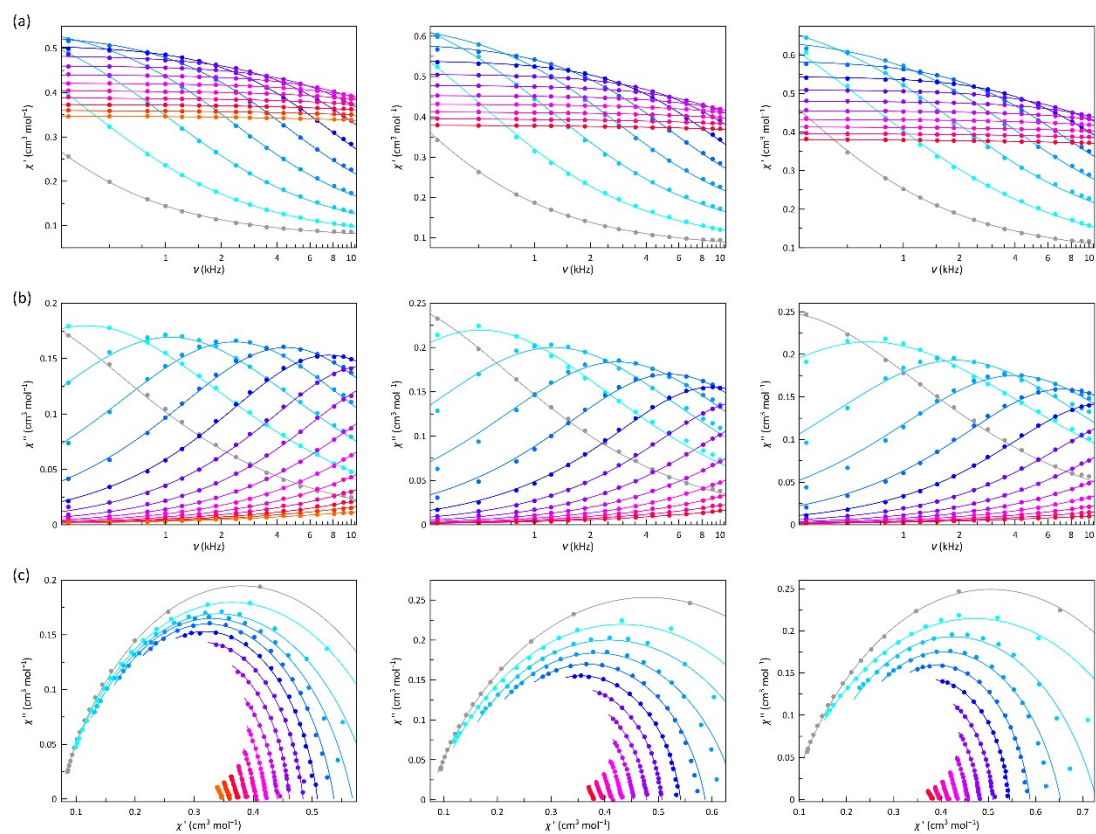

**Figure S59.** Frequency dependence of  $\chi_M'$  (a),  $\chi_M''$  (b) and Argand plots (c) for **1** under static magnetic fields of 2.5 (left), 1.0 (middle) and 0.5 (right) kOe with  $\pm 5.0$  Oe oscillating field in the temperature range 2.0–5.5 K in steps of 0.25 K (from grey to orange). The solid lines are the best-fit curves simulated by using the generalised Debye model

## 1.9. $^1\text{H}$ NMR analysis of cycloaddition reactions

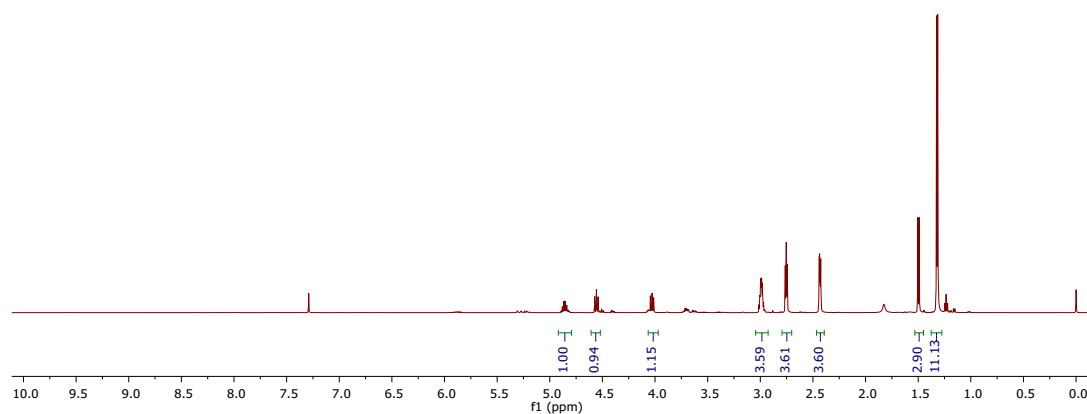

**Figure S60.**  $^1\text{H}$  NMR of crude mixture of reaction using propylene oxide.

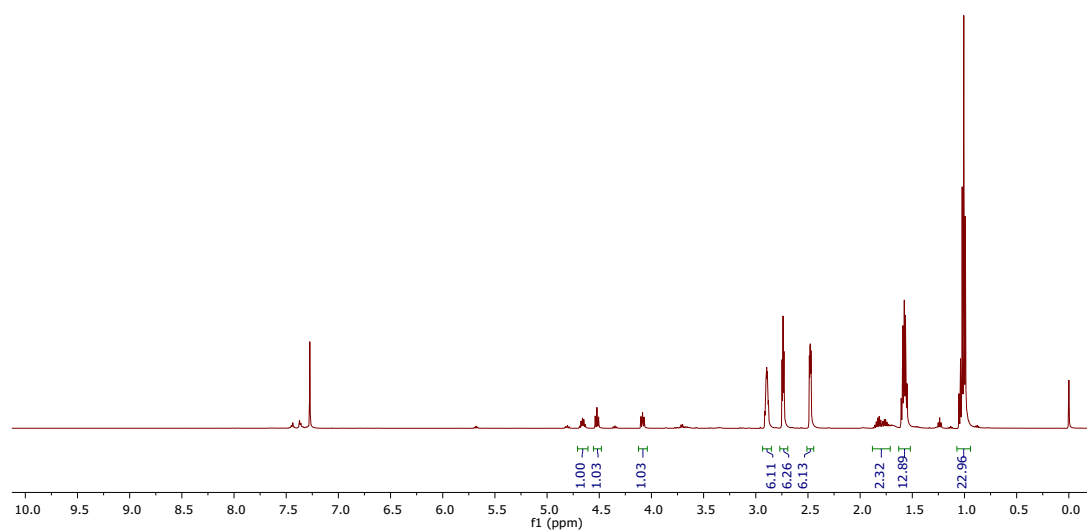

**Figure S61.**  $^1\text{H}$  NMR of crude mixture of reaction using 2-butyloxirane.

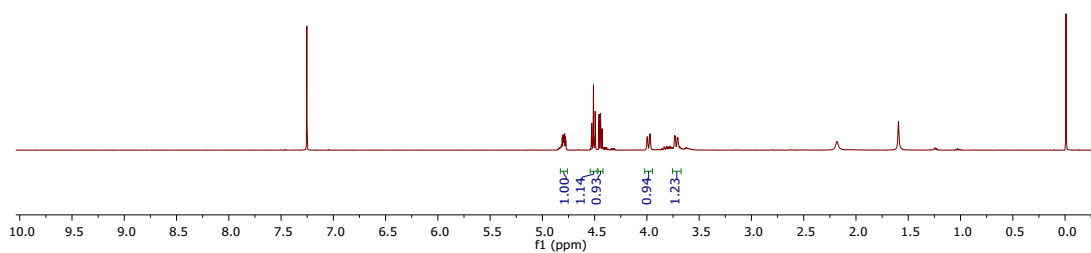

**Figure S62.**  $^1\text{H}$  NMR of crude mixture of reaction using glycidol.

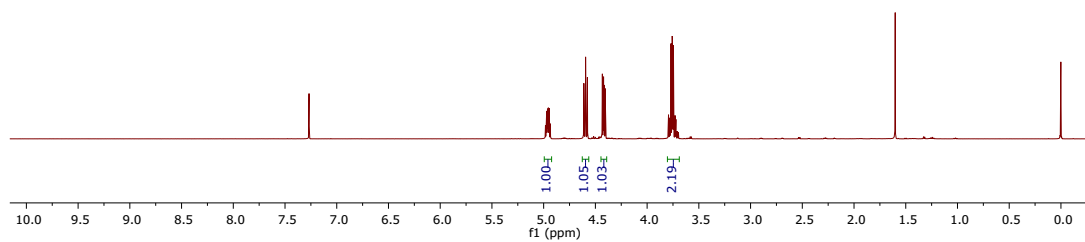

**Figure S63.**  $^1\text{H}$  NMR of crude mixture of reaction using epichlorohydrin.

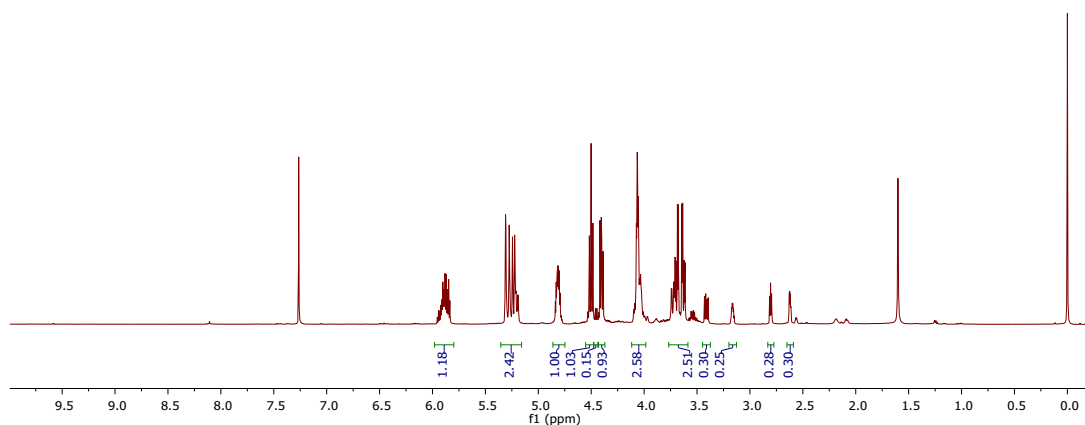

**Figure S64.**  $^1\text{H}$  NMR of crude mixture of reaction using ally glycidyl.

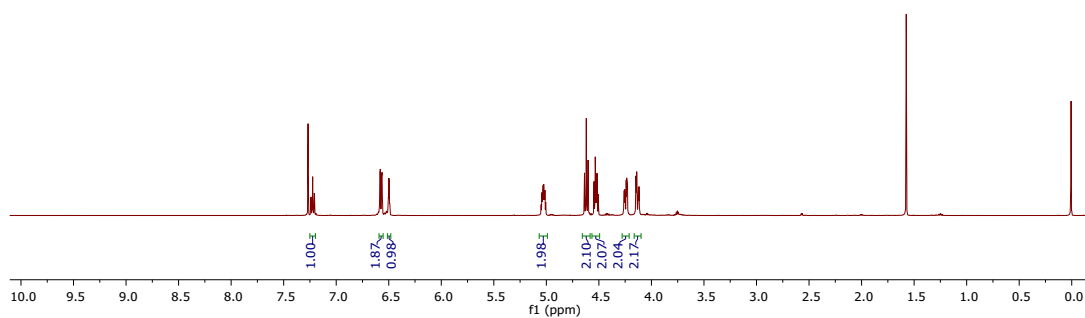

**Figure S65.**  $^1\text{H}$  NMR of crude mixture of reaction using ally glycidyl ether.

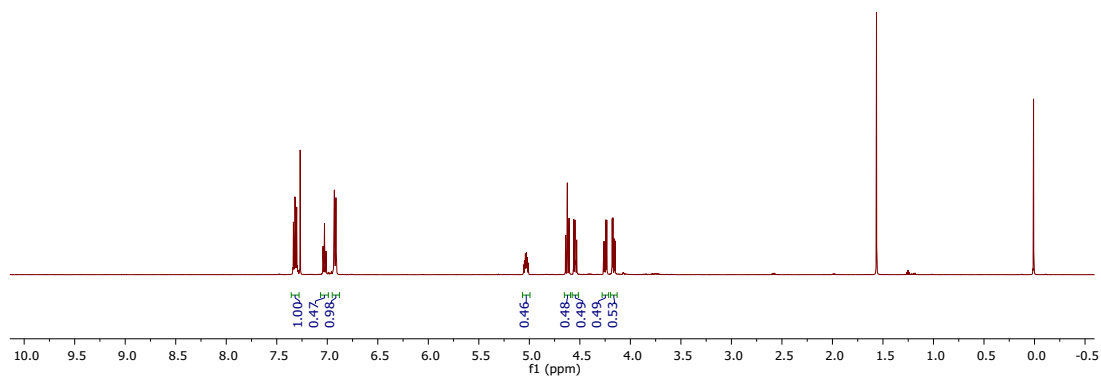

**Figure S66.** <sup>1</sup>H NMR of crude mixture of reaction using resorcinol diglycidyl ether.

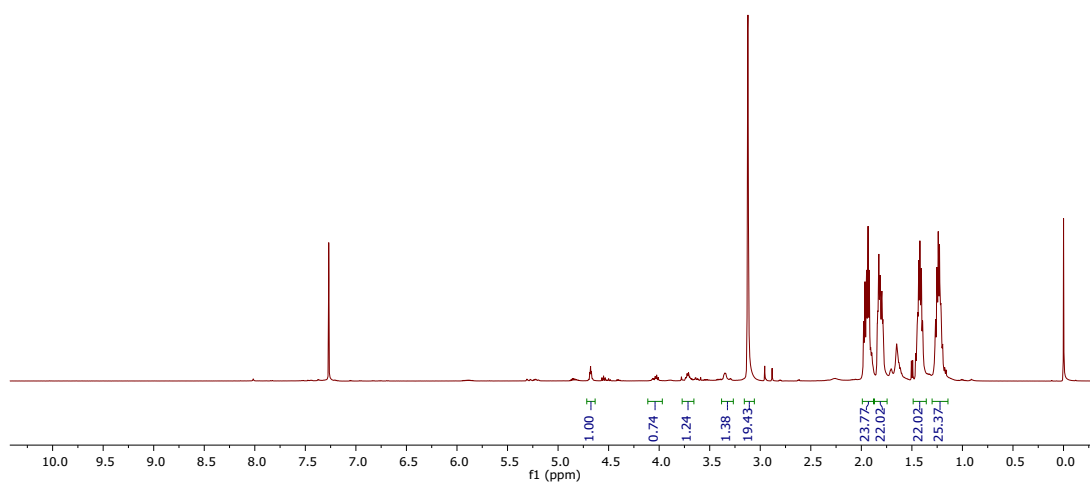

**Figure S67.** <sup>1</sup>H NMR of crude mixture of reaction using cyclohexene oxide.
